# Supplementary material
Source: Research Square preprint supplement (doi:10.21203/rs.3.rs-10208576/v1)
Supplement: Supplementary file 1 [file 3cbf3c25371f4561f2a5607b.xlsx]

## Sheet: Architecture Summary
PMS metric architecture summary
Metric type	Rows included in this file	Unique cadre groups / applicability	Unique departments/categories	Unique competency domains/themes	Notes
General metrics	47	4	1 (cross-cutting)	7	General/behavioural metrics mapped to cadres or role groups.
Technical metrics	154	4	13	98	Technical/role-specific metrics mapped to departments/categories.
Superior/supervisor metrics	8	All applicable cadres	1 (cross-cutting)	8	360-degree reviewer-source metrics for superior/supervisor assessment.
Peer metrics	8	All applicable cadres	1 (cross-cutting)	8	360-degree reviewer-source metrics for peer assessment.
Total	217	4			Contains metric architecture only; no individual staff scores or identifiable performance records.
General metrics by cadre group			Technical metrics by cadre group
Cadre group	General metric rows		Cadre group	Technical metric rows
Executive leadership	7		Executive leadership	12
Middle management	7		Middle management	54
Senior leadership	7		Senior leadership	26
Support staff	26		Support staff	62
General metrics by competency domain			Technical metrics by department/category
General competency domain	Metric rows		Department/category	Technical metric rows
Accountability & Ownership	7		Logistique et Maintenance	29
Attendance & Punctuality	7		Finance	17
Conflict Management	7		Communication	15
Effective Communication	7		Surveillance & Riposte	14
Ethical Compliance and Integrity	7		Direction	12
Team Leadership	5		Prestation des Services de Vaccination	12
Timeliness and Efficiency	7		Procurement	12
			Planification et Suivi-Évaluation	10
			Human resource	9
			Coordination Régionale	8
			Data management	8
			Admin & Finance	4
			Driver	4
Technical metrics by competency domain/theme
Technical competency domain/theme	Metric rows
Policy & Compliance Assurance	3
Process Coordination & Documentation	3
Strategic Procurement Planning	3
Vendor & Stock Oversight	3
AEFI Surveillance and Communication	2
Accountability & Ownership	2
Annual Work Plan Development and Updates	2
Capacity Building and Stakeholder Coordination	2
Capacity-Building and Development	2
Community Engagement and Mobilization	2
Coordination and Communication with Stakeholders	2
Creative Strategy Development for Routine Vaccination Performance	2
Cross-Section Collaboration and Coordination	2
Data Accuracy and Reporting for Newly Introduced Vaccines	2
Data Analysis and Feedback	2
Data Collection and Analysis Accuracy	2
Data Interpretation	2
Data Utilization for Decision-Making	2
Data quality and validation	2
Documentation, and Knowledge Management	2
Efficient Planning and Implementation of Preventive Immunization Campaigns	2
Employee Performance Monitoring	2
Epidemic Investigation and Control Strategy Implementation	2
Epidemic Surveillance and Monitoring	2
Equipment Inventory and Deployment	2
Firm leadership	2
Implementation & Sustainability of Initiatives	2
Integrated Communication and Digital Marketing Planning	2
Introduction, Monitoring, and Evaluation of New Vaccines	2
Knowledge management	2
Knowledge management and system oversight	2
Meeting Coordination and Effectiveness	2
Monitoring and Evaluation Strategy Development and Integration	2
Monitoring and Reporting	2
Monitoring and Supervision of Routine Vaccination Activities	2
Monitoring, Capacity Building, and Reporting	2
Operational Timetable Coordination	2
PEV Equipment Maintenance	2
Partnership Development and Resource Mobilization	2
Performance Monitoring and Reporting	2
Personnel management	2
Policy Advocacy and Strategic Planning	2
Policy Compliance and Implementation	2
Regional Vaccine Distribution	2
Reporting and Monitoring of Equipment Usage	2
Resource Management & Mobilization	2
Resource and Allowance Management	2
Stakeholder Engagement and Management	2
Surveillance and Epidemic Response	2
Timeliness of reports and statistical analyses	2
Vaccine Procurement Management	2
Vaccine Stock Management	2
Account Anomaly Absence	1
Audit Preparation and Legal Compliance	1
Bank Statement Production	1
Budget Monitoring	1
Budgeting and Financial Reporting	1
Capacity Building and Training	1
Communication Strategy and Planning Oversight	1
Communication and Conduct	1
Community Engagement Support	1
Compliance and Audit Preparation	1
Contract Execution and Compliance Monitoring	1
Data Management and Use	1
Data Quality and Reporting Oversight	1
Data Review and Use	1
Debtor/Creditor List Accuracy	1
Document Quality	1
Equipment and Cold Chain Management	1
Financial Management and Oversight	1
Financial Oversight and Accuracy	1
Human Resource Management and Policy Compliance	1
Logistics Data Management and Reporting	1
Meeting Participation & Engagement	1
Monitoring of Strategies and Data Quality	1
Monitoring, Evaluation, and Reporting	1
Monitoring, Reporting, and Digital Presence Management	1
New Vaccine Introduction and Performance Monitoring	1
Personal Leadership	1
Planning and Coordination	1
Platform Reconciliation	1
Procurement Planning and Documentation Management	1
Procurement and Resource Allocation	1
Reconciliation of General Balance	1
Staff Engagement	1
Stakeholder Coordination and Advocacy Leadership	1
Strategic Planning and Stakeholder Coordination	1
Strategic Reporting to Senior Leadership/Data-Informed Decisions	1
Strategy Development for Underperforming Districts	1
Supplier and Vendor Management	1
Suspense Account Clearance	1
Timeliness and Responsiveness	1
Timely Report Submission	1
Understanding of EPI Operations	1
Vaccination Activity Coordination and Oversight	1

## Sheet: Data Dictionary
Data dictionary
Column	Definition	Notes
Metric ID	Unique row identifier created for this supplementary file.
Metric type	Classification of the metric item.	General, Technical, Peer or Superior
Cadre group	Cadre or level label as represented in the source workbook.	Executive leadership, senior leadership, middle management or support staff.
Department/category	Department or regional category to which the metric applies.	General metrics are cross-cutting.
Competency domain/theme EN	English competency domain or metric theme.
Competency domain/theme FR	French competency domain or metric theme.
Metric item EN	English appraisal item for self-review or direct assessment.
Reviewer-adapted item EN	English appraisal item adapted for supervisor/subordinate review where applicable.
Metric item FR	French appraisal item for self-review or direct assessment.
Reviewer-adapted item FR	French appraisal item adapted for supervisor/subordinate review where applicable.

## Sheet: General Metrics
General metrics: cross-cutting behavioural and leadership competencies
Metric ID	Metric type	Cadre group	Department/category	Competency domain/theme EN	Competency domain/theme FR	Metric item EN	Reviewer-adapted item EN	Metric item FR	Reviewer-adapted item FR
GEN-001	General	Executive leadership	Cross-cutting	Timeliness and Efficiency	Rapidité et efficacité	How well do you anticipate operational delays and mobilize strategic resources to ensure timely execution of EPI program activities?	How well does your subordinate anticipate operational delays and mobilize strategic resources to ensure timely execution of EPI program activities?	Dans quelle mesure anticipez-vous les retards opérationnels et mobilisez-vous des ressources stratégiques pour assurer l’exécution en temps opportun des activités du programme PEV ?	Dans quelle mesure votre subordonné anticipe-t-il les retards opérationnels et mobilise-t-il des ressources stratégiques pour assurer l’exécution en temps opportun des activités du programme PEV ?
GEN-002	General	Executive leadership	Cross-cutting	Ethical Compliance and Integrity	Conformité éthique et intégrité	How well do you model ethical decision-making and ensure all leadership actions align with EPI’s code of conduct and national standards?	How well does your subordinate model ethical decision-making and ensure all leadership actions align with EPI’s code of conduct and national standards?	Dans quelle mesure modélisez-vous la prise de décision éthique et assurez-vous que toutes les actions de leadership sont conformes au code de conduite et aux normes nationales du PEV ?	Dans quelle mesure votre subordonné modélise-t-il la prise de décision éthique et garantit-il que toutes les actions de leadership sont conformes au code de conduite et aux normes nationales du PEV?
GEN-003	General	Executive leadership	Cross-cutting	Attendance & Punctuality	Assiduité et ponctualité	How consistently do you attend strategic meetings and ensure punctuality to reinforce a culture of discipline across the organization?	How consistently does your subordinate attend strategic meetings and ensure punctuality to reinforce a culture of discipline across the organization?	Dans quelle mesure assistez-vous régulièrement aux réunions stratégiques et assurez-vous la ponctualité pour renforcer une culture de discipline dans toute l’organisation ?	Dans quelle mesure votre subordonné assiste-t-il régulièrement aux réunions stratégiques et assure-t-il la ponctualité pour renforcer une culture de discipline dans toute l'organisation ?
GEN-004	General	Executive leadership	Cross-cutting	Effective Communication	Communication efficace	How well do you cascade high-level decisions and ensure message clarity, feedback integration, and transparency across all management levels?	How well does your subordinate cascade high-level decisions and ensure message clarity, feedback integration, and transparency across all management levels?	Dans quelle mesure parvenez-vous à diffuser les décisions de haut niveau et à garantir la clarté des messages, l’intégration des commentaires et la transparence à tous les niveaux de gestion ?	Dans quelle mesure votre subordonné transmet-il efficacement les décisions de haut niveau et garantit-il la clarté des messages, l'intégration des commentaires et la transparence à tous les niveaux de gestion ?
GEN-005	General	Executive leadership	Cross-cutting	Conflict Management	Gestion des conflits	How effectively do you intervene in high-level disputes and implement sustainable strategies to resolve organizational conflicts?	How effectively does your subordinate intervene in high-level disputes and implement sustainable strategies to resolve organizational conflicts?	Dans quelle mesure intervenez-vous efficacement dans les conflits de haut niveau et mettez-vous en œuvre des stratégies durables pour résoudre les conflits organisationnels ?	Dans quelle mesure votre subordonné intervient-il efficacement dans les conflits de haut niveau et met-il en œuvre des stratégies durables pour résoudre les conflits organisationnels ?
GEN-006	General	Executive leadership	Cross-cutting	Accountability & Ownership	Responsabilité et propriété	How effectively do you institutionalize performance accountability and ensure all directorates uphold standards of excellence?	How effectively does your subordinate institutionalize performance accountability and ensure all directorates uphold standards of excellence?	Dans quelle mesure institutionnalisez-vous efficacement la responsabilité en matière de performance et garantissez-vous que toutes les directions respectent les normes d’excellence ?	Dans quelle mesure votre subordonné institutionnalise-t-il efficacement la responsabilité en matière de performance et garantit-il que toutes les directions respectent les normes d’excellence ?
GEN-007	General	Executive leadership	Cross-cutting	Team Leadership	Leadership d'équipe	How well do you steer cross-functional leadership, align team vision to national EPI strategy, and drive results through strong coordination?	How well does your subordinate steer cross-functional leadership, align team vision to national EPI strategy, and drive results through strong coordination?	Dans quelle mesure parvenez-vous à diriger un leadership interfonctionnel, à aligner la vision de l’équipe sur la stratégie nationale du PEV et à obtenir des résultats grâce à une coordination solide ?	Dans quelle mesure votre subordonné gère-t-il le leadership interfonctionnel, aligne-t-il la vision de l’équipe sur la stratégie nationale du PEV et génère-t-il des résultats grâce à une coordination solide ?
GEN-008	General	Senior leadership	Cross-cutting	Timeliness and Efficiency	Rapidité et efficacité	How well do you plan and allocate resources to meet deadlines for reporting, supervision, and other EPI operations?	How well does your subordinate plan and allocate resources to meet deadlines for reporting, supervision, and other EPI operations?	Dans quelle mesure planifiez-vous et allouez-vous les ressources pour respecter les délais de reporting, de supervision et d’autres opérations du PEV ?	Dans quelle mesure votre subordonné planifie-t-il et alloue-t-il les ressources pour respecter les délais de reporting, de supervision et d’autres opérations du PEV ?
GEN-009	General	Senior leadership	Cross-cutting	Ethical Compliance and Integrity	Conformité éthique et intégrité	How consistently do you model and enforce compliance with EPI policies, ensuring ethical decisions and transparent operations?	How consistently does your subordinate model and enforce compliance with EPI policies, ensuring ethical decisions and transparent operations?	Dans quelle mesure modélisez-vous et appliquez-vous de manière cohérente la conformité aux politiques de l’EPI, en garantissant des décisions éthiques et des opérations transparentes ?	Dans quelle mesure votre subordonné modélise-t-il et applique-t-il de manière cohérente le respect des politiques du PEV, garantissant ainsi des décisions éthiques et des opérations transparentes ?
GEN-010	General	Senior leadership	Cross-cutting	Attendance & Punctuality	Assiduité et ponctualité	How well do you monitor and enforce punctual attendance among senior teams and key coordination platforms?	How well does your subordinate monitor and enforce punctual attendance among senior teams and key coordination platforms?	Dans quelle mesure surveillez-vous et assurez-vous la ponctualité des présences au sein des équipes de direction et des plateformes de coordination clés ?	Dans quelle mesure votre subordonné surveille-t-il et veille-t-il à la ponctualité des équipes seniors et des plateformes de coordination clés ?
GEN-011	General	Senior leadership	Cross-cutting	Effective Communication	Communication efficace	How effectively do you coordinate interdepartmental communication to ensure timely information flow and alignment on strategic priorities?	How effectively does your subordinate coordinate interdepartmental communication to ensure timely information flow and alignment on strategic priorities?	Dans quelle mesure coordonnez-vous efficacement la communication interministérielle pour garantir un flux d’informations en temps opportun et un alignement sur les priorités stratégiques ?	Dans quelle mesure votre subordonné coordonne-t-il efficacement la communication interdépartementale pour garantir un flux d’informations en temps opportun et un alignement sur les priorités stratégiques ?
GEN-012	General	Senior leadership	Cross-cutting	Conflict Management	Gestion des conflits	How well do you resolve operational disagreements across senior units and facilitate constructive dialogue during escalations?	How well does your subordinate resolve operational disagreements across senior units and facilitate constructive dialogue during escalations?	Dans quelle mesure parvenez-vous à résoudre les désaccords opérationnels entre les unités supérieures et à faciliter un dialogue constructif lors des escalades ?	Dans quelle mesure votre subordonné résout-il les désaccords opérationnels entre les unités supérieures et facilite-t-il un dialogue constructif lors des escalades ?
GEN-013	General	Senior leadership	Cross-cutting	Accountability & Ownership	Responsabilité et propriété	How well do you ensure each department takes responsibility for meeting performance targets and correcting underperformance?	How well does your subordinate ensure each department takes responsibility for meeting performance targets and correcting underperformance?	Dans quelle mesure assurez-vous que chaque service assume la responsabilité d’atteindre les objectifs de performance et de corriger les sous-performances ?	Dans quelle mesure votre subordonné s’assure-t-il que chaque service assume la responsabilité d’atteindre les objectifs de performance et de corriger les sous-performances ?
GEN-014	General	Senior leadership	Cross-cutting	Team Leadership	Leadership d'équipe	How well do you provide direction to unit heads, foster collaboration, and ensure delivery of regional or divisional targets?	How well does your subordinate provide direction to unit heads, foster collaboration, and ensure delivery of regional or divisional targets?	Dans quelle mesure parvenez-vous à fournir des orientations aux chefs d’unité, à favoriser la collaboration et à garantir la réalisation des objectifs régionaux ou divisionnaires ?	Dans quelle mesure votre subordonné fournit-il des directives aux chefs d’unité, favorise-t-il la collaboration et assure-t-il la réalisation des objectifs régionaux ou divisionnaires ?
GEN-015	General	Middle management	Cross-cutting	Timeliness and Efficiency	Rapidité et efficacité	How effectively does your unit/section meet deadlines to ensure smooth operational flow across all EPI functions?	How effectively does your subordinate's unit/section meet deadlines to ensure smooth operational flow across all EPI functions?	Dans quelle mesure votre unité/section respecte-t-elle efficacement les délais pour garantir un flux opérationnel fluide dans toutes les fonctions du PEV ?	Dans quelle mesure l'unité/section de votre subordonné respecte-t-elle efficacement les délais pour garantir un flux opérationnel fluide dans toutes les fonctions du PEV ?
GEN-016	General	Middle management	Cross-cutting	Ethical Compliance and Integrity	Conformité éthique et intégrité	To what extent does your unit adhere to EPI regulations and foster a culture of integrity, honesty, and responsibility among support staff?	To what extent does your subordinate's unit adhere to EPI regulations and foster a culture of integrity, honesty, and responsibility among support staff?	Dans quelle mesure votre unité adhère-t-elle aux réglementations EPI et favorise-t-elle une culture d’intégrité, d’honnêteté et de responsabilité parmi le personnel de soutien ?	Dans quelle mesure l'unité de votre subordonné adhère-t-elle aux réglementations du PEV et favorise-t-elle une culture d'intégrité, d'honnêteté et de responsabilité entre les collaborateurs?
GEN-017	General	Middle management	Cross-cutting	Attendance & Punctuality	Assiduité et ponctualité	How well do you enforce punctuality and consistent attendance within your team or among colleagues?	How well does your subordinate enforce punctuality and consistent attendance within your team or among colleagues?	Dans quelle mesure assurez-vous la ponctualité et la présence constante au sein de votre équipe ou parmi vos collègues ?	Dans quelle mesure votre subordonné veille-t-il à la ponctualité et à la présence constante au sein de votre équipe ou parmi vos collègues ?
GEN-018	General	Middle management	Cross-cutting	Effective Communication	Communication efficace	To what extent do you lead internal communication to ensure effective coordination of activities, cross-functional collaboration, and clear feedback loops within your unit?	To what extent does your subordinate lead internal communication to ensure effective coordination of activities, cross-functional collaboration, and clear feedback loops within his/her unit?	Dans quelle mesure dirigez-vous la communication interne pour assurer une coordination efficace des activités, une collaboration interfonctionnelle et des boucles de rétroaction claires au sein de votre unité ?	Dans quelle mesure votre subordonné dirige-t-il la communication interne pour assurer une coordination efficace des activités, une collaboration interfonctionnelle et des boucles de rétroaction claires au sein de son unité ?
GEN-019	General	Middle management	Cross-cutting	Conflict Management	Gestion des conflits	How well do you mediate conflicts within your team, fostering a respectful and solution-oriented environment that minimizes disruptions and promotes collaboration?	How well does your subordinate mediate conflicts within your team, fostering a respectful and solution-oriented environment that minimizes disruptions and promotes collaboration?	Dans quelle mesure gérez-vous les conflits au sein de votre équipe, en favorisant un environnement respectueux et axé sur les solutions qui minimise les perturbations et favorise la collaboration ?	Dans quelle mesure votre subordonné gère-t-il les conflits au sein de votre équipe, favorisant un environnement respectueux et axé sur les solutions qui minimise les perturbations et favorise la collaboration ?
GEN-020	General	Middle management	Cross-cutting	Accountability & Ownership	Responsabilité et propriété	To what extent do you establish a culture of accountability within your unit, fostering individual ownership of responsibilities, adherence to organizational standards, and proactive problem-solving?	To what extent does your subordinate establish a culture of accountability within his/her unit, fostering individual ownership of responsibilities, adherence to organizational standards, and proactive problem-solving?	Dans quelle mesure établissez-vous une culture de responsabilité au sein de votre unité, favorisant l’appropriation individuelle des responsabilités, le respect des normes organisationnelles et la résolution proactive des problèmes ?	Dans quelle mesure votre subordonné établit-il une culture de responsabilité au sein de son unité, favorisant l’appropriation individuelle des responsabilités, le respect des normes organisationnelles et la résolution proactive des problèmes ?
GEN-021	General	Middle management	Cross-cutting	Team Leadership	Leadership d'équipe	How well do you lead and manage team members by setting clear goals, providing guidance, fostering collaboration, and ensuring performance meets your unit/section's objectives?	How well does your subordinate lead and manage team members by setting clear goals, providing guidance, fostering collaboration, and ensuring performance meets his/her unit/section's objectives?	Dans quelle mesure dirigez-vous et gérez-vous bien les membres de l’équipe en fixant des objectifs clairs, en fournissant des conseils, en favorisant la collaboration et en veillant à ce que les performances répondent aux objectifs de votre unité/section ?	Dans quelle mesure votre subordonné dirige-t-il et gère-t-il bien les membres de l'équipe en fixant des objectifs clairs, en fournissant des conseils, en favorisant la collaboration et en veillant à ce que les performances répondent aux objectifs de son unité/section ?
GEN-022	General	Support staff	Cross-cutting	Timeliness and Efficiency	Rapidité et efficacité	How efficiently do you manage logistics, communication, and coordination to support timely delivery of administrative functions?	How efficiently does your subordinate manage logistics, communication, and coordination to support timely delivery of administrative functions?	Avec quelle efficacité gérez-vous la logistique, la communication et la coordination pour soutenir la prestation en temps voulu des fonctions administratives ?	Dans quelle mesure votre subordonné gère-t-il efficacement la logistique, la communication et la coordination pour soutenir l’exécution en temps opportun des fonctions administratives ?
GEN-023	General	Support staff	Cross-cutting	Ethical Compliance and Integrity	Conformité éthique et intégrité	How well do you maintain professional integrity while handling sensitive administrative requests or documentation?	How well does your subordinate maintain professional integrity while handling sensitive administrative requests or documentation?	Dans quelle mesure maintenez-vous votre intégrité professionnelle lors du traitement de demandes ou de documents administratifs sensibles ?	Dans quelle mesure votre subordonné maintient-il son intégrité professionnelle lors du traitement de demandes administratives ou de documents sensibles ?
GEN-024	General	Support staff	Cross-cutting	Attendance & Punctuality	Assiduité et ponctualité	How regularly do you attend your scheduled shifts and meetings without delays or absences?	How regularly does your subordinate attend your scheduled shifts and meetings without delays or absences?	À quelle fréquence assistez-vous à vos quarts de travail et réunions prévus sans retard ni absence ?	À quelle fréquence votre subordonné assiste-t-il à vos quarts de travail et réunions prévus sans retard ni absence ?
GEN-025	General	Support staff	Cross-cutting	Effective Communication	Communication efficace	How effectively do you communicate information and relay instructions across departments to support smooth administrative operations?	How effectively does your subordinate communicate information and relay instructions across departments to support smooth administrative operations?	Dans quelle mesure communiquez-vous efficacement les informations et transmettez-vous les instructions entre les services pour favoriser le bon fonctionnement des opérations administratives ?	Dans quelle mesure votre subordonné communique-t-il efficacement les informations et transmet-il les instructions entre les services pour favoriser le bon déroulement des opérations administratives ?
GEN-026	General	Support staff	Cross-cutting	Conflict Management	Gestion des conflits	How do you manage interpersonal conflicts within administrative roles and promote a collaborative work culture?	How does your subordinate manage interpersonal conflicts within administrative roles and promote a collaborative work culture?	Comment gérez-vous les conflits interpersonnels au sein des rôles administratifs et favorisez-vous une culture de travail collaborative ?	Comment votre subordonné gère-t-il les conflits interpersonnels au sein des rôles administratifs et favorise-t-il une culture de travail collaborative ?
GEN-027	General	Support staff	Cross-cutting	Accountability & Ownership	Responsabilité et propriété	How well do you take responsibility for administrative duties, follow through on tasks, and support operational transparency?	How well does your subordinate take responsibility for administrative duties, follow through on tasks, and support operational transparency?	Dans quelle mesure assumez-vous la responsabilité des tâches administratives, menez-vous à bien les tâches et soutenez-vous la transparence opérationnelle ?	Dans quelle mesure votre subordonné assume-t-il la responsabilité des tâches administratives, mène-t-il à bien ses tâches et soutient-il la transparence opérationnelle ?
GEN-028	General	Support staff	Cross-cutting	Team Leadership	Leadership d'équipe	How well do you coordinate administrative support staff and ensure task completion aligns with EPI program needs?	How well does your subordinate coordinate administrative support staff and ensure task completion aligns with EPI program needs?	Dans quelle mesure coordonnez-vous le personnel de soutien administratif et assurez-vous que l’exécution des tâches correspond aux besoins du programme PEV?	Dans quelle mesure votre subordonné coordonne-t-il le personnel de soutien administratif et s'assure-t-il que l'exécution des tâches correspond aux besoins du programme PEV?
GEN-029	General	Support staff	Cross-cutting	Timeliness and Efficiency	Rapidité et efficacité	How timely are you in delivering field logistics, reports, and supplies to support routine and outreach services?	How timely is your subordinate in delivering field logistics, reports, and supplies to support routine and outreach services?	Dans quelle mesure fournissez-vous ponctuellement la logistique sur le terrain, les rapports et les fournitures nécessaires pour soutenir les services de routine et de proximité ?	Dans quelle mesure votre subordonné est-il ponctuel dans la fourniture de la logistique sur le terrain, des rapports et des fournitures pour soutenir les services de routine et de proximité ?
GEN-030	General	Support staff	Cross-cutting	Ethical Compliance and Integrity	Conformité éthique et intégrité	How well do you comply with ethical standards and follow community engagement protocols in field activities?	How well does your subordinate comply with ethical standards and follow community engagement protocols in field activities?	Dans quelle mesure respectez-vous les normes éthiques et suivez-vous les protocoles d’engagement communautaire dans les activités sur le terrain ?	Dans quelle mesure votre subordonné respecte-t-il les normes éthiques et suit-il les protocoles d’engagement communautaire dans les activités sur le terrain ?
GEN-031	General	Support staff	Cross-cutting	Attendance & Punctuality	Assiduité et ponctualité	How consistent are you in attending field visits, community activities, and coordination meetings on time?	How consistent is your subordinate in attending field visits, community activities, and coordination meetings on time?	Dans quelle mesure participez-vous régulièrement aux visites sur le terrain, aux activités communautaires et aux réunions de coordination à l’heure ?	Dans quelle mesure votre subordonné est-il constant dans sa participation aux visites sur le terrain, aux activités communautaires et aux réunions de coordination à temps ?
GEN-032	General	Support staff	Cross-cutting	Effective Communication	Communication efficace	How effectively do you communicate with field teams, community leaders, and supervisors to coordinate interventions?	How effectively does your subordinate communicate with field teams, community leaders, and supervisors to coordinate interventions?	Dans quelle mesure communiquez-vous efficacement avec les équipes de terrain, les dirigeants communautaires et les superviseurs pour coordonner les interventions ?	Dans quelle mesure votre subordonné communique-t-il efficacement avec les équipes de terrain, les dirigeants communautaires et les superviseurs pour coordonner les interventions ?
GEN-033	General	Support staff	Cross-cutting	Conflict Management	Gestion des conflits	How well do you manage field-level tensions or community complaints while promoting respectful dialogue?	How well does your subordinate manage field-level tensions or community complaints while promoting respectful dialogue?	Dans quelle mesure gérez-vous les tensions sur le terrain ou les plaintes de la communauté tout en favorisant un dialogue respectueux ?	Dans quelle mesure votre subordonné gère-t-il les tensions sur le terrain ou les plaintes de la communauté tout en favorisant un dialogue respectueux ?
GEN-034	General	Support staff	Cross-cutting	Accountability & Ownership	Responsabilité et propriété	How well do you take ownership of field responsibilities and maintain transparency in reporting and logistics handling?	How well does your subordinate take ownership of field responsibilities and maintain transparency in reporting and logistics handling?	Dans quelle mesure assumez-vous les responsabilités sur le terrain et maintenez-vous la transparence dans les rapports et la gestion logistique ?	Dans quelle mesure votre subordonné assume-t-il ses responsabilités sur le terrain et maintient-il la transparence dans les rapports et la gestion logistique ?
GEN-035	General	Support staff	Cross-cutting	Team Leadership	Leadership d'équipe	How effectively do you coordinate field support activities, ensuring alignment with operational plans and teamwork?	How effectively does your subordinate coordinate field support activities, ensuring alignment with operational plans and teamwork?	Dans quelle mesure coordonnez-vous efficacement les activités de soutien sur le terrain, en garantissant l’alignement avec les plans opérationnels et le travail d’équipe ?	Dans quelle mesure votre subordonné coordonne-t-il efficacement les activités de soutien sur le terrain, en garantissant l’alignement avec les plans opérationnels et le travail d’équipe ?
GEN-036	General	Support staff	Cross-cutting	Timeliness and Efficiency	Rapidité et efficacité	How well do you complete tasks on time to support the smooth running of activities such as vaccine distribution, reporting, and documentation?	How well does your subordinate complete tasks on time to support the smooth running of activities such as vaccine distribution, reporting, and documentation?	Dans quelle mesure accomplissez-vous les tâches à temps pour assurer le bon déroulement des activités telles que la distribution des vaccins, la production de rapports et la documentation ?	Dans quelle mesure votre subordonné accomplit-il ses tâches à temps pour favoriser le bon déroulement des activités telles que la distribution des vaccins, la production de rapports et la documentation ?
GEN-037	General	Support staff	Cross-cutting	Ethical Compliance and Integrity	Conformité éthique et intégrité	How well do you apply EPI regulations and demonstrate honesty, responsibility, and commitment to EPI values in your daily tasks?	How well does your subordinate apply EPI regulations and demonstrate honesty, responsibility, and commitment to EPI values in your daily tasks?	Dans quelle mesure appliquez-vous les réglementations du PEV et faites-vous preuve d’honnêteté, de responsabilité et d’engagement envers les valeurs du PEV dans vos tâches quotidiennes ?	Dans quelle mesure votre subordonné applique-t-il les réglementations du PEV et fait-il preuve d'honnêteté, de responsabilité et d'engagement envers les valeurs du PEV dans ses tâches quotidiennes ?
GEN-038	General	Support staff	Cross-cutting	Attendance & Punctuality	Assiduité et ponctualité	How reliable are you in attending planned engagements and arriving on time for scheduled events?	How reliable is your subordinate in attending planned engagements and arriving on time for scheduled events?	Dans quelle mesure êtes-vous fiable pour assister aux engagements prévus et arriver à l’heure aux événements programmés ?	Dans quelle mesure votre subordonné est-il fiable pour assister aux engagements prévus et arriver à l’heure aux événements programmés ?
GEN-039	General	Support staff	Cross-cutting	Effective Communication	Communication efficace	How well do you utilize communication platforms (emails, instant messaging) to coordinate with colleagues, provide clear updates, and deliver timely feedback to facilitate team alignment?	How well does your subordinate utilize communication platforms (emails, instant messaging) to coordinate with colleagues, provide clear updates, and deliver timely feedback to facilitate team alignment?	Dans quelle mesure utilisez-vous les plateformes de communication (courriels, messagerie instantanée) pour vous coordonner avec vos collègues, fournir des mises à jour claires et fournir des commentaires en temps opportun pour faciliter l'alignement de l'équipe ?	Dans quelle mesure votre subordonné utilise-t-il les plateformes de communication (courriels, messagerie instantanée) pour se coordonner avec ses collègues, fournir des mises à jour claires et fournir des commentaires en temps opportun pour faciliter l'alignement de l'équipe ?
GEN-040	General	Support staff	Cross-cutting	Conflict Management	Gestion des conflits	How well do you address minor conflicts, maintain open communication with colleagues, and contribute to a cooperative work environment?	How well does your subordinate address minor conflicts, maintain open communication with colleagues, and contribute to a cooperative work environment?	Dans quelle mesure gérez-vous les conflits mineurs, maintenez-vous une communication ouverte avec vos collègues et contribuez-vous à un environnement de travail coopératif ?	Dans quelle mesure votre subordonné gère-t-il les conflits mineurs, maintient-il une communication ouverte avec ses collègues et contribue-t-il à un environnement de travail coopératif ?
GEN-041	General	Support staff	Cross-cutting	Accountability & Ownership	Responsabilité et propriété	How well do you demonstrate accountability by completing tasks thoroughly and transparently, taking ownership of personal responsibilities, and contributing to team reliability?	How well does your subordinate demonstrate accountability by completing tasks thoroughly and transparently, taking ownership of personal responsibilities, and contributing to team reliability?	Dans quelle mesure faites-vous preuve de responsabilité en accomplissant les tâches de manière approfondie et transparente, en assumant vos responsabilités personnelles et en contribuant à la fiabilité de l’équipe ?	Dans quelle mesure votre subordonné fait-il preuve de responsabilité en accomplissant ses tâches de manière approfondie et transparente, en assumant ses responsabilités personnelles et en contribuant à la fiabilité de l’équipe ?
GEN-042	General	Support staff	Cross-cutting	Timeliness and Efficiency	Rapidité et efficacité	How well do you complete tasks on time to support the smooth running of activities such as vaccine distribution, reporting, and documentation?	How well does your subordinate complete tasks on time to support the smooth running of activities such as vaccine distribution, reporting, and documentation?	Dans quelle mesure accomplissez-vous les tâches à temps pour assurer le bon déroulement des activités telles que la distribution des vaccins, la production de rapports et la documentation ?	Dans quelle mesure votre subordonné accomplit-il ses tâches à temps pour favoriser le bon déroulement des activités telles que la distribution des vaccins, la production de rapports et la documentation ?
GEN-043	General	Support staff	Cross-cutting	Ethical Compliance and Integrity	Conformité éthique et intégrité	How well do you apply EPI regulations and demonstrate honesty, responsibility, and commitment to EPI values in your daily tasks?	How well does your subordinate apply EPI regulations and demonstrate honesty, responsibility, and commitment to EPI values in your daily tasks?	Dans quelle mesure appliquez-vous les réglementations du PEV et faites-vous preuve d’honnêteté, de responsabilité et d’engagement envers les valeurs de l’EPI dans vos tâches quotidiennes ?	Dans quelle mesure votre subordonné applique-t-il les réglementations du PEV et fait-il preuve d'honnêteté, de responsabilité et d'engagement envers les valeurs du PEV dans ses tâches quotidiennes ?
GEN-044	General	Support staff	Cross-cutting	Attendance & Punctuality	Assiduité et ponctualité	How reliable are you in attending planned engagements and arriving on time for scheduled events?	How reliable is your subordinate in attending planned engagements and arriving on time for scheduled events?	Dans quelle mesure êtes-vous fiable pour assister aux engagements prévus et arriver à l’heure aux événements programmés ?	Dans quelle mesure votre subordonné est-il fiable pour assister aux engagements prévus et arriver à l’heure aux événements programmés ?
GEN-045	General	Support staff	Cross-cutting	Effective Communication	Communication efficace	How well do you utilize communication platforms (emails, instant messaging) to coordinate with colleagues, provide clear updates, and deliver timely feedback to facilitate team alignment?	How well does your subordinate utilize communication platforms (emails, instant messaging) to coordinate with colleagues, provide clear updates, and deliver timely feedback to facilitate team alignment?	Dans quelle mesure utilisez-vous les plateformes de communication (courriels, messagerie instantanée) pour vous coordonner avec vos collègues, fournir des mises à jour claires et fournir des commentaires en temps opportun pour faciliter l'alignement de l'équipe ?	Dans quelle mesure votre subordonné utilise-t-il les plateformes de communication (courriels, messagerie instantanée) pour se coordonner avec ses collègues, fournir des mises à jour claires et fournir des commentaires en temps opportun pour faciliter l'alignement de l'équipe ?
GEN-046	General	Support staff	Cross-cutting	Conflict Management	Gestion des conflits	How well do you address minor conflicts, maintain open communication with colleagues, and contribute to a cooperative work environment?	How well does your subordinate address minor conflicts, maintain open communication with colleagues, and contribute to a cooperative work environment?	Dans quelle mesure gérez-vous les conflits mineurs, maintenez-vous une communication ouverte avec vos collègues et contribuez-vous à un environnement de travail coopératif ?	Dans quelle mesure votre subordonné gère-t-il les conflits mineurs, maintient-il une communication ouverte avec ses collègues et contribue-t-il à un environnement de travail coopératif ?
GEN-047	General	Support staff	Cross-cutting	Accountability & Ownership	Responsabilité et propriété	How well do you demonstrate accountability by completing tasks thoroughly and transparently, taking ownership of personal responsibilities, and contributing to team reliability?	How well does your subordinate demonstrate accountability by completing tasks thoroughly and transparently, taking ownership of personal responsibilities, and contributing to team reliability?	Dans quelle mesure faites-vous preuve de responsabilité en accomplissant les tâches de manière approfondie et transparente, en assumant vos responsabilités personnelles et en contribuant à la fiabilité de l’équipe ?	Dans quelle mesure votre subordonné fait-il preuve de responsabilité en accomplissant ses tâches de manière approfondie et transparente, en assumant ses responsabilités personnelles et en contribuant à la fiabilité de l’équipe ?

## Sheet: Technical Metrics
Technical metrics: role-specific and department/category-specific competencies
Metric ID	Metric type	Cadre group	Department/category	Competency domain/theme EN	Competency domain/theme FR	Metric item EN	Reviewer-adapted item EN	Metric item FR	Reviewer-adapted item FR	Cleaning note
TECH-001	Technical	Senior leadership	Coordination Régionale	Firm leadership	Un leadership ferme	To what extent have you made a measurable impact on EPI staff, partners, and revenue that contributes directly to improved immunization coverage and program sustainability?	To what extent have your subordinate made a measurable impact on EPI staff, partners, and revenue that contributes directly to improved immunization coverage and program sustainability?	Dans quelle mesure avez-vous eu un impact mesurable sur le personnel, les partenaires et les revenus du PEV qui contribue directement à l’amélioration de la couverture vaccinale et à la durabilité du programme ?	Dans quelle mesure votre subordonné a-t-il eu un impact mesurable sur le personnel, les partenaires et les revenus du PEV qui contribue directement à l’amélioration de la couverture vaccinale et à la durabilité du programme ?
TECH-002	Technical	Senior leadership	Coordination Régionale	Accountability & Ownership	Responsabilité et propriété	How effectively do you establish a culture of accountability within your region, fostering individual ownership, adherence to organizational standards, and proactive problem-solving?	How effectively does your subordinate establish a culture of accountability within your region, fostering individual ownership, adherence to organizational standards, and proactive problem-solving?	Dans quelle mesure établissez-vous efficacement une culture de responsabilité au sein de votre région, favorisant l’appropriation individuelle, le respect des normes organisationnelles et la résolution proactive des problèmes ?	Dans quelle mesure votre subordonné parvient-il à établir une culture de responsabilité au sein de votre région, favorisant l’appropriation individuelle, le respect des normes organisationnelles et la résolution proactive des problèmes ?
TECH-003	Technical	Senior leadership	Coordination Régionale	Meeting Coordination and Effectiveness	Coordination et efficacité des réunions	How consistently do you maintain regular coordination meetings to ensure team alignment and progress, using approved templates to guide performance towards targets?	How consistently does your subordinate maintain regular coordination meetings to ensure team alignment and progress, using approved templates to guide performance towards targets?	Dans quelle mesure maintenez-vous régulièrement des réunions de coordination pour garantir l’alignement et les progrès de l’équipe, en utilisant des modèles approuvés pour guider les performances vers les objectifs ?	Dans quelle mesure votre subordonné organise-t-il régulièrement des réunions de coordination pour garantir l'alignement et les progrès de l'équipe, en utilisant des modèles approuvés pour guider les performances vers les objectifs ?
TECH-004	Technical	Senior leadership	Coordination Régionale	Stakeholder Engagement and Management	Engagement et gestion des parties prenantes	How effectively do you manage interactions with external stakeholders (e.g., government agencies, community leaders, suppliers)?	How effectively does your subordinate manage interactions with external stakeholders (e.g., government agencies, community leaders, suppliers)?	Dans quelle mesure gérez-vous efficacement les interactions avec les parties prenantes externes (par exemple, les agences gouvernementales, les dirigeants communautaires, les fournisseurs) ?	Dans quelle mesure votre subordonné gère-t-il efficacement les interactions avec les parties prenantes externes (par exemple, les agences gouvernementales, les dirigeants communautaires, les fournisseurs) ?
TECH-005	Technical	Senior leadership	Coordination Régionale	Resource Management & Mobilization	Gestion et mobilisation des ressources	To what extent are you actively seeking additional resources by engaging potential partners to optimize EPI performance?	To what extent is your subordinate actively seeking additional resources by engaging potential partners to optimize EPI performance?	Dans quelle mesure recherchez-vous activement des ressources supplémentaires en engageant des partenaires potentiels pour optimiser les performamnce du PEV ?	Dans quelle mesure votre subordonné recherche-t-il activement des ressources supplémentaires en engageant des partenaires potentiels pour optimiser les performances du PEV ?
TECH-006	Technical	Senior leadership	Coordination Régionale	Knowledge management	Gestion des connaissances	How effectively do you coordinate the creation of knowledge materials that showcase regional achievements and strengthen the EPI system’s professional image?	How effectively does your subordinate coordinate the creation of knowledge materials that showcase regional achievements and strengthen the EPI system’s professional image?	Dans quelle mesure coordonnez-vous la production de supports valorisant les réalisations régionales et l’image du système PEV ?	Dans quelle mesure votre subordonné coordonne-t-il efficacement la création de supports de connaissances qui mettent en valeur les réalisations régionales et renforcent l’image professionnelle du système PEV?
TECH-007	Technical	Senior leadership	Coordination Régionale	Implementation & Sustainability of Initiatives	Mise en œuvre et pérennisation des initiatives	How well do you lead your region in implementing sustainable practices that support core objectives, fostering continuous improvement and resilience?	How well does your subordinate lead your region in implementing sustainable practices that support core objectives, fostering continuous improvement and resilience?	Dans quelle mesure dirigez-vous la mise en œuvre de pratiques durables alignées sur les objectifs clés, favorisant l'amélioration continue et la résilience dans votre région ?	Dans quelle mesure votre subordonné dirige-t-il votre région dans la mise en œuvre de pratiques durables qui soutiennent les objectifs fondamentaux, favorisant l’amélioration continue et la résilience ?
TECH-008	Technical	Senior leadership	Coordination Régionale	Data Interpretation	Interprétation des données	How well do you use data and performance metrics to inform decisions and ensure alignment with organizational goals?	How well does your subordinate use data and performance metrics to inform decisions and ensure alignment with organizational goals?	Dans quelle mesure utilisez-vous les données et les indicateurs de performance pour éclairer vos prises de décision ?	Dans quelle mesure votre subordonné utilise-t-il les données et les indicateurs de performance pour éclairer les décisions et garantir l’alignement avec les objectifs organisationnels ?
TECH-009	Technical	Executive leadership	Direction	Personal Leadership	Leadership personnel	How well do you guide high-level decisions to align EPI operations and programs with national public health goals?	How well does your subordinate guide high-level decisions to align EPI operations and programs with national public health goals?	Dans quelle mesure orientez-vous les décisions stratégiques pour aligner les activités du PEV sur les objectifs nationaux de santé publique ?	Dans quelle mesure votre subordonné guide-t-il les décisions de haut niveau pour aligner les opérations et les programmes du PEV sur les objectifs nationaux de santé publique ?
TECH-010	Technical	Executive leadership	Direction	Firm leadership	Un leadership ferme	To what extent have you made a measurable impact on EPI staff, partners, and revenue that contributes directly to improved immunization coverage and program sustainability?	To what extent have your subordinate made a measurable impact on EPI staff, partners, and revenue that contributes directly to improved immunization coverage and program sustainability?	Dans quelle mesure cet impact a-t-il contribué à l’amélioration de la couverture vaccinale et à la durabilité du programme ?	Dans quelle mesure votre subordonné a-t-il eu un impact mesurable sur le personnel, les partenaires et les revenus du PEV qui contribue directement à l’amélioration de la couverture vaccinale et à la durabilité du programme ?
TECH-011	Technical	Executive leadership	Direction	Accountability & Ownership	Responsabilité et propriété	How well do you ensure accountability frameworks are in place across the organization to promote transparency and meet performance standards?	How well does your subordinate ensure accountability frameworks are in place across the organization to promote transparency and meet performance standards?	Dans quelle mesure assurez-vous que des cadres de responsabilisation sont en place dans l’ensemble de l’organisation pour promouvoir la transparence et respecter les normes de performance ?	Dans quelle mesure votre subordonné s’assure-t-il que des cadres de responsabilisation sont en place dans toute l’organisation pour promouvoir la transparence et respecter les normes de performance ?
TECH-012	Technical	Executive leadership	Direction	Meeting Participation & Engagement	Participation et engagement aux réunions	How effectively do you lead strategic-level meetings with diverse stakeholders to foster alignment with organizational goals and enhance decision-making across EPI functions?	How effectively does your subordinate lead strategic-level meetings with diverse stakeholders to foster alignment with organizational goals and enhance decision-making across EPI functions?	Dans quelle mesure dirigez-vous efficacement des réunions stratégiques avec les parties prenantes du PEV ?	Dans quelle mesure votre subordonné dirige-t-il efficacement des réunions de niveau stratégique avec diverses parties prenantes pour favoriser l’alignement avec les objectifs organisationnels et améliorer la prise de décision dans toutes les fonctions du PEV ?
TECH-013	Technical	Executive leadership	Direction	Meeting Coordination and Effectiveness	Coordination et efficacité des réunions	How well do you implement organization-wide coordination protocols to ensure timely decision-making and maintain momentum across EPI functions?	How well does your subordinate implement organization-wide coordination protocols to ensure timely decision-making and maintain momentum across EPI functions?	Dans quelle mesure mettez-vous en œuvre des protocoles de coordination à l’échelle de l’organisation pour garantir une prise de décision rapide et maintenir la dynamique dans toutes les fonctions du PEV ?	Dans quelle mesure votre subordonné met-il en œuvre les protocoles de coordination à l’échelle de l’organisation pour garantir une prise de décision rapide et maintenir la dynamique dans toutes les fonctions du PEV?
TECH-014	Technical	Executive leadership	Direction	Stakeholder Engagement and Management	Engagement et gestion des parties prenantes	How well do you engage with government bodies, donors, and partners to align external support with EPI goals and represent EPI programs nationally and internationally for funding and policy advocacy?	How well does your subordinate engage with government bodies, donors, and partners to align external support with EPI goals and represent EPI programs nationally and internationally for funding and policy advocacy?	Dans quelle mesure collaborez-vous avec les organismes gouvernementaux, les donateurs et les partenaires pour aligner leur soutien sur les objectifs du PEV ?	Dans quelle mesure votre subordonné s'engage-t-il auprès des organismes gouvernementaux, des donateurs et des partenaires pour aligner le soutien externe sur les objectifs du PEV et représenter les programmes du PEV à l'échelle nationale et internationale pour le financement et le plaidoyer politique ?
TECH-015	Technical	Executive leadership	Direction	Understanding of EPI Operations	Compréhension des opérations de l'EPI	How effectively do you lead responses to operational crises, ensuring the organization is prepared for and responsive to emerging challenges?	How effectively does your subordinate lead responses to operational crises, ensuring the organization is prepared for and responsive to emerging challenges?	Dans quelle mesure dirigez-vous efficacement les réponses aux crises opérationnelles, en vous assurant que l’organisation est préparée et réactive aux défis émergents ?	Dans quelle mesure votre subordonné dirige-t-il efficacement les réponses aux crises opérationnelles, en veillant à ce que l’organisation soit préparée et réactive aux défis émergents ?
TECH-016	Technical	Executive leadership	Direction	Resource Management & Mobilization	Gestion et mobilisation des ressources	How successful are you in securing funding and partnerships to strengthen EPI resources, while optimizing financial and non-financial assets for sustained growth and impact?	How successful is your subordinate in securing funding and partnerships to strengthen EPI resources, while optimizing financial and non-financial assets for sustained growth and impact?	Dans quelle mesure parvenez-vous à obtenir des financements et des partenariats pour renforcer les ressources du PEV, tout en optimisant les actifs financiers et non financiers pour une croissance et un impact durables ?	Dans quelle mesure votre subordonné parvient-il à obtenir des financements et des partenariats pour renforcer les ressources du PEV, tout en optimisant les actifs financiers et non financiers pour une croissance et un impact durables ?
TECH-017	Technical	Executive leadership	Direction	Knowledge management	Gestion des connaissances	How well do you lead high-level initiatives for national and international publication, contributing to public health knowledge and advocacy for EPI programs?	How well does your subordinate lead high-level initiatives for national and international publication, contributing to public health knowledge and advocacy for EPI programs?	Dans quelle mesure dirigez-vous des initiatives de haut niveau en matière de publication nationale et internationale, contribuant ainsi à la connaissance de la santé publique et au plaidoyer en faveur des programmes PEV ?	Dans quelle mesure votre subordonné dirige-t-il des initiatives de haut niveau en matière de publication nationale et internationale, contribuant ainsi aux connaissances en matière de santé publique et au plaidoyer en faveur des programmes PEV ?
TECH-018	Technical	Executive leadership	Direction	Implementation & Sustainability of Initiatives	Mise en œuvre et pérennisation des initiatives	How effectively do you design and oversee strategies for the sustainable implementation of key initiatives that align with national health objectives?	How effectively does your subordinate design and oversee strategies for the sustainable implementation of key initiatives that align with national health objectives?	Dans quelle mesure concevez-vous et supervisez-vous efficacement les stratégies de mise en œuvre durable des initiatives clés qui s’alignent sur les objectifs nationaux de santé ?	Dans quelle mesure votre subordonné conçoit-il et supervise-t-il efficacement les stratégies de mise en œuvre durable des initiatives clés qui s’alignent sur les objectifs nationaux de santé ?
TECH-019	Technical	Executive leadership	Direction	Data Interpretation	Interprétation des données	How well do you use data and performance metrics to inform decisions and ensure alignment with organizational goals?	How well does your subordinate use data and performance metrics to inform decisions and ensure alignment with organizational goals?	Dans quelle mesure utilisez-vous les données et les indicateurs de performance pour éclairer les décisions et garantir l’alignement avec les objectifs organisationnels ?	Dans quelle mesure votre subordonné utilise-t-il les données et les indicateurs de performance pour éclairer les décisions et garantir l’alignement avec les objectifs organisationnels ?
TECH-020	Technical	Executive leadership	Direction	Strategic Reporting to Senior Leadership/Data-Informed Decisions	Rapports stratégiques à la haute direction/Décisions fondées sur des données	How timely and effective are you in reporting key performance metrics to senior leadership and external stakeholders?	How timely and effective is your subordinate in reporting key performance metrics to senior leadership and external stakeholders?	Dans quelle mesure communiquez-vous rapidement et efficacement les indicateurs clés de performance à la haute direction et aux parties prenantes externes ?	Dans quelle mesure votre subordonné communique-t-il rapidement et efficacement les indicateurs de performance clés à la haute direction et aux parties prenantes externes ?
TECH-021	Technical	Senior leadership	Prestation des Services de Vaccination	Vaccination Activity Coordination and Oversight	Coordination et supervision des activités de vaccination	How effectively do you coordinate and supervise routine and supplementary vaccination activities to ensure alignment with national strategies?	How effectively does your subordinate coordinate and supervise routine and supplementary vaccination activities to ensure alignment with national strategies?	Dans quelle mesure coordonnez-vous et supervisez-vous efficacement les activités de vaccination de routine et supplémentaires pour garantir leur alignement sur les stratégies nationales ?	Dans quelle mesure votre subordonné coordonne-t-il et supervise-t-il efficacement les activités de vaccination de routine et supplémentaires pour garantir l’alignement avec les stratégies nationales ?
TECH-022	Technical	Senior leadership	Prestation des Services de Vaccination	New Vaccine Introduction and Performance Monitoring	Introduction de nouveaux vaccins et suivi de leurs performances	How well do you oversee the introduction of new vaccines, ensuring smooth rollout and effective monitoring of coverage and performance?	How well does your subordinate oversee the introduction of new vaccines, ensuring smooth rollout and effective monitoring of coverage and performance?	Dans quelle mesure supervisez-vous l’introduction de nouveaux vaccins, en garantissant un déploiement fluide et un suivi efficace de la couverture et des performances ?	Dans quelle mesure votre subordonné supervise-t-il l’introduction de nouveaux vaccins, en garantissant un déploiement fluide et un suivi efficace de la couverture et des performances ?
TECH-023	Technical	Senior leadership	Prestation des Services de Vaccination	Data Quality and Reporting Oversight	Surveillance de la qualité des données et des rapports	How effectively do you ensure the accuracy and timeliness of vaccination data and AEFI reports, and implement corrective actions based on reviews	How effectively does your subordinate ensure the accuracy and timeliness of vaccination data and AEFI reports, and implement corrective actions based on reviews	Dans quelle mesure garantissez-vous efficacement l'exactitude et la rapidité des données de vaccination et des rapports sur les effets indésirables et mettez-vous en œuvre des mesures correctives basées sur les examens ?	Dans quelle mesure votre subordonné garantit-il efficacement l'exactitude et la rapidité des données de vaccination et des rapports d'effets indésirables et met-il en œuvre des mesures correctives en fonction des examens ?
TECH-024	Technical	Senior leadership	Prestation des Services de Vaccination	Strategic Planning and Stakeholder Coordination	Planification stratégique et coordination des parties prenantes	How well do you implement vaccination acceleration strategies in underperforming regions while coordinating with stakeholders to achieve national immunization goals?	How well does your subordinate implement vaccination acceleration strategies in underperforming regions while coordinating with stakeholders to achieve national immunization goals?	Dans quelle mesure mettez-vous en œuvre des stratégies d’accélération de la vaccination dans les régions sous-performantes tout en coordonnant les parties prenantes pour atteindre les objectifs nationaux de vaccination ?	Dans quelle mesure votre subordonné met-il en œuvre les stratégies d’accélération de la vaccination dans les régions sous-performantes tout en coordonnant avec les parties prenantes pour atteindre les objectifs nationaux de vaccination ?
TECH-025	Technical	Senior leadership	Logistique et Maintenance	Vaccine Procurement and Distribution Oversight	Surveillance de l'approvisionnement et de la distribution des vaccins	How well do you oversee vaccine procurement, arrival, and regional distribution, ensuring timely delivery, proper storage, and adherence to quality standards?	How well does your subordinate oversee vaccine procurement, arrival, and regional distribution, ensuring timely delivery, proper storage, and adherence to quality standards?	Dans quelle mesure supervisez-vous l’approvisionnement, l’arrivée et la distribution régionale des vaccins, en garantissant une livraison dans les délais, un stockage approprié et le respect des normes de qualité ?	Dans quelle mesure votre subordonné supervise-t-il l’approvisionnement, l’arrivée et la distribution régionale des vaccins, garantissant une livraison dans les délais, un stockage approprié et le respect des normes de qualité ?
TECH-026	Technical	Senior leadership	Logistique et Maintenance	Equipment and Cold Chain Management	Gestion des équipements et de la chaîne du froid	To what extent do you ensure the availability, maintenance, and optimal use of cold chain equipment and other logistics tools, while overseeing regular inventories?	To what extent does your subordinate ensure the availability, maintenance, and optimal use of cold chain equipment and other logistics tools, while overseeing regular inventories?	Dans quelle mesure assurez-vous la disponibilité, la maintenance et l’utilisation optimale des équipements de la chaîne du froid et des autres outils logistiques, tout en supervisant les inventaires réguliers ?	Dans quelle mesure votre subordonné assure-t-il la disponibilité, l’entretien et l’utilisation optimale des équipements de la chaîne du froid et des autres outils logistiques, tout en supervisant les inventaires réguliers ?
TECH-027	Technical	Senior leadership	Logistique et Maintenance	Logistics Data Management and Reporting	Gestion et reporting des données logistiques	How well do you manage logistics data, ensuring accurate tracking of supplies and equipment, and producing timely reports to support decision-making?	How well does your subordinate manage logistics data, ensuring accurate tracking of supplies and equipment, and producing timely reports to support decision-making?	Dans quelle mesure assurez-vous un suivi précis des fournitures et des équipements logistiques du PEV ?	Dans quelle mesure votre subordonné gère-t-il bien les données logistiques, en assurant un suivi précis des fournitures et de l’équipement et en produisant des rapports en temps opportun pour soutenir la prise de décision ?
TECH-028	Technical	Senior leadership	Communication	Communication Strategy and Planning Oversight	Stratégie de communication et supervision de la planification	How effectively do you design and implement vaccination communication strategies, including social marketing and community engagement, in alignment with program objectives?	How effectively does your subordinate design and implement vaccination communication strategies, including social marketing and community engagement, in alignment with program objectives?	Dans quelle mesure concevez-vous efficacement des stratégies de communication sur la vaccination, y compris le marketing social ?	Dans quelle mesure votre subordonné conçoit-il et met-il en œuvre efficacement des stratégies de communication sur la vaccination, y compris le marketing social et l’engagement communautaire, conformément aux objectifs du programme ?
TECH-029	Technical	Senior leadership	Communication	Stakeholder Coordination and Advocacy Leadership	Coordination des parties prenantes et leadership en matière de plaidoyer	How well do you engage stakeholders and lead advocacy efforts to prioritize vaccination in national agendas and secure strategic partnerships?	How well does your subordinate engage stakeholders and lead advocacy efforts to prioritize vaccination in national agendas and secure strategic partnerships?	Dans quelle mesure impliquez-vous les parties prenantes et dirigez-vous les efforts de plaidoyer pour donner la priorité à la vaccination dans les agendas nationaux et garantir des partenariats stratégiques ?	Dans quelle mesure votre subordonné engage-t-il les parties prenantes et dirige-t-il les efforts de plaidoyer pour donner la priorité à la vaccination dans les agendas nationaux et garantir des partenariats stratégiques ?
TECH-030	Technical	Senior leadership	Communication	Monitoring, Reporting, and Digital Presence Management	Surveillance, reporting et gestion de la présence numérique	How effectively do you oversee the monitoring and reporting of communication activities and manage digital platforms to enhance program visibility?	How effectively does your subordinate oversee the monitoring and reporting of communication activities and manage digital platforms to enhance program visibility?	Dans quelle mesure supervisez-vous efficacement le suivi et le reporting des activités de communication et gérez-vous les plateformes numériques pour améliorer la visibilité du programme ?	Dans quelle mesure votre subordonné supervise-t-il efficacement le suivi et le reporting des activités de communication et gère-t-il les plateformes numériques pour améliorer la visibilité du programme ?
TECH-031	Technical	Senior leadership	Admin & Finance	Financial Management and Oversight	Gestion financière et surveillance	How effectively do you oversee financial management processes, ensuring timely and accurate reporting in compliance with budgetary guidelines?	How effectively does your subordinate oversee financial management processes, ensuring timely and accurate reporting in compliance with budgetary guidelines?	Dans quelle mesure supervisez-vous efficacement les processus de gestion financière, en garantissant des rapports opportuns et précis, conformément aux directives budgétaires ?	Dans quelle mesure votre subordonné supervise-t-il efficacement les processus de gestion financière, garantissant des rapports opportuns et précis, conformément aux directives budgétaires ?
TECH-032	Technical	Senior leadership	Admin & Finance	Procurement and Resource Allocation	Approvisionnement et allocation des ressources	To what extent do you lead procurement planning and resource allocation, ensuring contract execution and compliance with organizational goals?	To what extent does your subordinate lead procurement planning and resource allocation, ensuring contract execution and compliance with organizational goals?	Dans quelle mesure dirigez-vous la planification des achats et l’allocation des ressources, en garantissant l’exécution des contrats et le respect des objectifs organisationnels ?	Dans quelle mesure votre subordonné dirige-t-il la planification des achats et l’allocation des ressources, garantissant l’exécution du contrat et le respect des objectifs organisationnels ?
TECH-033	Technical	Senior leadership	Admin & Finance	Human Resource Management and Policy Compliance	Gestion des ressources humaines et conformité aux politiques	How effectively do you manage personnel, oversee performance, and ensure compliance with HR policies across all functions?	How effectively does your subordinate manage personnel, oversee performance, and ensure compliance with HR policies across all functions?	Dans quelle mesure gérez-vous efficacement le personnel, supervisez-vous les performances et assurez-vous le respect des politiques RH dans toutes les fonctions ?	Dans quelle mesure votre subordonné gère-t-il efficacement le personnel, supervise-t-il les performances et assure-t-il le respect des politiques RH dans toutes les fonctions ?
TECH-034	Technical	Senior leadership	Admin & Finance	Audit Preparation and Legal Compliance	Préparation de l'audit et conformité légale	How well do you coordinate audit preparations, ensuring all financial and HR records meet regulatory standards, and implement necessary corrective actions?	How well does your subordinate coordinate audit preparations, ensuring all financial and HR records meet regulatory standards, and implement necessary corrective actions?	Dans quelle mesure coordonnez-vous les préparatifs d’audit, en veillant à ce que tous les dossiers financiers et RH soient conformes aux normes réglementaires et en mettant en œuvre les mesures correctives nécessaires ?	Dans quelle mesure votre subordonné coordonne-t-il les préparatifs d’audit, en veillant à ce que tous les dossiers financiers et RH soient conformes aux normes réglementaires et en mettant en œuvre les mesures correctives nécessaires ?
TECH-035	Technical	Middle management	Logistique et Maintenance	Data Collection and Analysis Accuracy	Précision de la collecte et de l'analyse des données	How effectively do you oversee data collection processes, ensuring the accuracy of analysis, data integrity, and using insights to inform program improvements?	How effectively does your subordinate oversee data collection processes, ensuring the accuracy of analysis, data integrity, and using insights to inform program improvements?	Dans quelle mesure supervisez-vous efficacement les processus de collecte de données, en garantissant l’exactitude de l’analyse, l’intégrité des données et en utilisant les informations pour éclairer les améliorations du programme ?	Dans quelle mesure votre subordonné supervise-t-il efficacement les processus de collecte de données, en garantissant l’exactitude de l’analyse, l’intégrité des données et en utilisant les informations pour éclairer les améliorations du programme ?
TECH-036	Technical	Middle management	Logistique et Maintenance	Monitoring and Supervision of Routine Vaccination Activities	Suivi et supervision des activités de vaccination de routine	How well do you lead the monitoring and supervision of routine vaccination activities, including ACD micro-planning, staff training, and supervision evaluations?	How well does your subordinate lead the monitoring and supervision of routine vaccination activities, including ACD micro-planning, staff training, and supervision evaluations?	Dans quelle mesure dirigez-vous le suivi et la supervision des activités de vaccination de routine, y compris la micro-planification de l’ACD, la formation du personnel et les évaluations de supervision ?	Dans quelle mesure votre subordonné dirige-t-il le suivi et la supervision des activités de vaccination de routine, y compris la micro-planification de l'ACD, la formation du personnel et les évaluations de supervision ?
TECH-037	Technical	Middle management	Logistique et Maintenance	Creative Strategy Development for Routine Vaccination Performance	Développement d'une stratégie créative pour la performance de la vaccination de routine	How well do you develop innovative strategies to improve routine vaccination coverage, identify underperforming areas, and collaborate with other sections to implement sustainable solutions?	How well does your subordinate develop innovative strategies to improve routine vaccination coverage, identify underperforming areas, and collaborate with other sections to implement sustainable solutions?	Dans quelle mesure développez-vous des stratégies innovantes pour améliorer la couverture vaccinale de routine, identifier les domaines sous-performants et collaborer avec d’autres sections pour mettre en œuvre des solutions durables ?	Dans quelle mesure votre subordonné élabore-t-il des stratégies innovantes pour améliorer la couverture vaccinale de routine, identifier les domaines sous-performants et collaborer avec d’autres sections pour mettre en œuvre des solutions durables ?
TECH-038	Technical	Middle management	Logistique et Maintenance	Efficient Planning and Implementation of Preventive Immunization Campaigns	Planification et mise en œuvre efficaces des campagnes de vaccination préventive	How effectively do you oversee the planning and implementation of preventive immunization campaigns to ensure they align with national health strategies and organizational objectives?	How effectively does your subordinate oversee the planning and implementation of preventive immunization campaigns to ensure they align with national health strategies and organizational objectives?	Dans quelle mesure supervisez-vous efficacement la planification et la mise en œuvre des campagnes de vaccination préventive pour garantir qu’elles sont conformes aux stratégies nationales de santé et aux objectifs organisationnels ?	Dans quelle mesure votre subordonné supervise-t-il efficacement la planification et la mise en œuvre des campagnes de vaccination préventive pour garantir qu’elles s’alignent sur les stratégies nationales de santé et les objectifs organisationnels ?
TECH-039	Technical	Middle management	Logistique et Maintenance	Introduction, Monitoring, and Evaluation of New Vaccines	Introduction, suivi et évaluation des nouveaux vaccins	To what extent do you lead the introduction of new vaccines, coordinating across teams to ensure timely roll-out; monitors progress and performance, analyzes data from regions, and conducts evaluations to assess the effectiveness of the new vaccines, making adjustments where necessary	To what extent does your subordinate lead the introduction of new vaccines, coordinating across teams to ensure timely roll-out; monitors progress and performance, analyzes data from regions, and conducts evaluations to assess the effectiveness of the new vaccines, making adjustments where necessary	Dans quelle mesure assurez-vous la coordination des équipes pour un déploiement rapide lors de l’introduction de nouveaux vaccins ?	Dans quelle mesure votre subordonné dirige-t-il l'introduction de nouveaux vaccins, en coordonnant les équipes pour assurer un déploiement rapide ; surveille-t-il les progrès et les performances, analyse les données des régions et effectue-t-il des évaluations pour évaluer l'efficacité des nouveaux vaccins, en effectuant des ajustements si nécessaire ?
TECH-040	Technical	Middle management	Logistique et Maintenance	Data Accuracy and Reporting for Newly Introduced Vaccines	Exactitude des données et rapports sur les vaccins nouvellement introduits	How effectively do you oversee data collection and reporting for newly introduced vaccines, ensuring alignment with organizational reporting standards?	How effectively does your subordinate oversee data collection and reporting for newly introduced vaccines, ensuring alignment with organizational reporting standards?	Dans quelle mesure supervisez-vous efficacement la collecte et la communication des données sur les nouveaux vaccins introduits, en garantissant l’alignement avec les normes de communication organisationnelles ?	Dans quelle mesure votre subordonné supervise-t-il efficacement la collecte et la communication des données sur les vaccins nouvellement introduits, en garantissant l’alignement avec les normes de rapport de l’organisation ?
TECH-041	Technical	Middle management	Logistique et Maintenance	Vaccine Procurement Management	Gestion de l'approvisionnement en vaccins	How effectively do you oversee vaccine procurement and arrival processes, ensuring shipments meet quality and compliance standards?	How effectively does your subordinate oversee vaccine procurement and arrival processes, ensuring shipments meet quality and compliance standards?	Dans quelle mesure supervisez-vous efficacement les processus d’approvisionnement et d’arrivée des vaccins, en vous assurant que les expéditions répondent aux normes de qualité et de conformité ?	Dans quelle mesure votre subordonné supervise-t-il efficacement les processus d’approvisionnement et d’arrivée des vaccins, en veillant à ce que les expéditions répondent aux normes de qualité et de conformité ?
TECH-042	Technical	Middle management	Logistique et Maintenance	Vaccine Stock Management	Gestion des stocks de vaccins	How effectively do you supervise vaccine inventory processes, validate stock levels, and ensure alignment with storage protocols?	How effectively does your subordinate supervise vaccine inventory processes, validate stock levels, and ensure alignment with storage protocols?	Dans quelle mesure supervisez-vous efficacement les processus d’inventaire des vaccins, validez-vous les niveaux de stock et assurez-vous l’alignement avec les protocoles de stockage ?	Dans quelle mesure votre subordonné supervise-t-il efficacement les processus d’inventaire des vaccins, valide-t-il les niveaux de stock et assure-t-il l’alignement avec les protocoles de stockage ?
TECH-043	Technical	Middle management	Logistique et Maintenance	Regional Vaccine Distribution	Distribution régionale des vaccins	How effectively do you oversee regional vaccine distribution, ensuring proper transportation and storage while providing feedback to improve logistics?	How effectively does your subordinate oversee regional vaccine distribution, ensuring proper transportation and storage while providing feedback to improve logistics?	Dans quelle mesure supervisez-vous efficacement la distribution régionale des vaccins, en garantissant un transport et un stockage appropriés tout en fournissant des commentaires pour améliorer la logistique ?	Dans quelle mesure votre subordonné supervise-t-il efficacement la distribution régionale des vaccins, en garantissant un transport et un stockage appropriés tout en fournissant des commentaires pour améliorer la logistique ?
TECH-044	Technical	Middle management	Logistique et Maintenance	Data Analysis and Feedback	Analyse des données et rétroaction	How effectively do you validate analyses of regional deliverables, ensuring accuracy and providing structured feedback for vaccine management improvements?	How effectively does your subordinate validate analyses of regional deliverables, ensuring accuracy and providing structured feedback for vaccine management improvements?	Dans quelle mesure validez-vous efficacement les analyses des livrables régionaux, en garantissant l’exactitude et en fournissant un retour d’information structuré pour améliorer la gestion des vaccins ?	Dans quelle mesure votre subordonné valide-t-il efficacement les analyses des livrables régionaux, en garantissant l’exactitude et en fournissant des commentaires structurés pour améliorer la gestion des vaccins ?
TECH-045	Technical	Middle management	Logistique et Maintenance	Equipment Inventory and Deployment	Inventaire et déploiement des équipements	To what extent do you oversee the development and regular updates of equipment inventories and ensure efficient deployment at all levels?	To what extent does your subordinate oversee the development and regular updates of equipment inventories and ensure efficient deployment at all levels?	Dans quelle mesure supervisez-vous le développement et les mises à jour régulières des inventaires d’équipements et assurez-vous un déploiement efficace à tous les niveaux ?	Dans quelle mesure votre subordonné supervise-t-il le développement et les mises à jour régulières des inventaires d’équipement et assure-t-il un déploiement efficace à tous les niveaux ?
TECH-046	Technical	Middle management	Logistique et Maintenance	PEV Equipment Maintenance	Maintenance des équipements PEV	How well do you develop and monitor the PEV equipment maintenance plan, supervising service providers and ensuring adherence to SOPs?for breakdowns and emergencies	How well does your subordinate develop and monitor the PEV equipment maintenance plan, supervising service providers and ensuring adherence to SOPs?for breakdowns and emergencies	Dans quelle mesure élaborez-vous et surveillez-vous le plan de maintenance de l'équipement PEV, en supervisant les prestataires de services et en garantissant le respect des SOP ? pour les pannes et les urgences	Dans quelle mesure votre subordonné élabore-t-il et surveille-t-il le plan de maintenance de l'équipement PEV, en supervisant les prestataires de services et en garantissant le respect des SOP en cas de panne et d'urgence ?
TECH-047	Technical	Middle management	Logistique et Maintenance	Reporting and Monitoring of Equipment Usage	Rapports et suivi de l'utilisation des équipements	To what extent do you review and validate reports on equipment performance and completed interventions, providing actionable insights to improve equipment reliability and optimize resource use	To what extent does your subordinate review and validate reports on equipment performance and completed interventions, providing actionable insights to improve equipment reliability and optimize resource use	Dans quelle mesure examinez-vous et validez-vous les rapports sur les performances des équipements et les interventions réalisées ?	Dans quelle mesure votre subordonné examine-t-il et valide-t-il les rapports sur les performances de l'équipement et les interventions terminées, fournissant des informations exploitables pour améliorer la fiabilité de l'équipement et optimiser l'utilisation des ressources
TECH-048	Technical	Middle management	Surveillance & Riposte	Surveillance and Epidemic Response	Surveillance et réponse aux épidémies	To what extent do you validate epidemiological data and coordinate the investigation of outbreaks to ensure timely response?	To what extent does your subordinate validate epidemiological data and coordinate the investigation of outbreaks to ensure timely response?	Dans quelle mesure validez-vous les données épidémiologiques et coordonnez-vous l’enquête sur les épidémies pour garantir une réponse rapide ?	Dans quelle mesure votre subordonné valide-t-il les données épidémiologiques et coordonne-t-il l’enquête sur les épidémies pour garantir une réponse rapide ?
TECH-049	Technical	Middle management	Surveillance & Riposte	AEFI Surveillance and Communication	Surveillance et communication des MAPI	To what extent do you ensure clear communication on AEFI cases, oversee the reporting process, and coordinate with stakeholders?	To what extent does your subordinate ensure clear communication on AEFI cases, oversee the reporting process, and coordinate with stakeholders?	Dans quelle mesure assurez-vous une communication claire sur les cas d’EIPV, supervisez-vous le processus de signalement et coordonnez-vous avec les parties prenantes ?	Dans quelle mesure votre subordonné assure-t-il une communication claire sur les cas d’EIPV, supervise-t-il le processus de signalement et coordonne-t-il avec les parties prenantes ?
TECH-050	Technical	Middle management	Surveillance & Riposte	Capacity Building and Stakeholder Coordination	Renforcement des capacités et coordination des parties prenantes	How efficiently do you lead training programs for vaccine providers and coordinate stakeholders for effective surveillance and response?	How efficiently does your subordinate lead training programs for vaccine providers and coordinate stakeholders for effective surveillance and response?	Dans quelle mesure dirigez-vous efficacement les programmes de formation destinés aux prestataires de vaccins et coordonnez-vous les parties prenantes pour une surveillance et une réponse efficaces ?	Dans quelle mesure votre subordonné dirige-t-il efficacement les programmes de formation destinés aux fournisseurs de vaccins et coordonne-t-il les parties prenantes pour une surveillance et une réponse efficaces ?
TECH-051	Technical	Middle management	Surveillance & Riposte	Epidemic Surveillance and Monitoring	Surveillance et suivi des épidémies	To what extent do you lead the monitoring of epidemic data, analyze trends, and provide periodic feedback for intervention?	To what extent does your subordinate lead the monitoring of epidemic data, analyze trends, and provide periodic feedback for intervention?	Dans quelle mesure dirigez-vous le suivi des données épidémiques, analysez-vous les tendances et fournissez-vous un retour d’information périodique pour l’intervention ?	Dans quelle mesure votre subordonné dirige-t-il la surveillance des données épidémiques, analyse-t-il les tendances et fournit-il un retour d’information périodique pour l’intervention ?
TECH-052	Technical	Middle management	Surveillance & Riposte	Epidemic Investigation and Control Strategy Implementation	Mise en œuvre de la stratégie d'investigation et de contrôle des épidémies	How effectively do you develop and implement epidemic control strategies, including vaccination and curative care measures?	How effectively does your subordinate develop and implement epidemic control strategies, including vaccination and curative care measures?	Dans quelle mesure élaborez-vous et mettez-vous en œuvre efficacement des stratégies de contrôle des épidémies, y compris des mesures de vaccination et de soins curatifs ?	Dans quelle mesure votre subordonné élabore-t-il et met-il en œuvre efficacement des stratégies de contrôle des épidémies, y compris des mesures de vaccination et de soins curatifs ?
TECH-053	Technical	Middle management	Surveillance & Riposte	Coordination and Communication with Stakeholders	Coordination et communication avec les parties prenantes	To what extent do you coordinate epidemic response activities with MINSANTE, partners, and the public to ensure strategy alignment?	To what extent does your subordinate coordinate epidemic response activities with MINSANTE, partners, and the public to ensure strategy alignment?	Dans quelle mesure coordonnez-vous les activités de réponse à l’épidémie avec le MINSANTE, les partenaires et le public pour assurer l’alignement de la stratégie ?	Dans quelle mesure votre subordonné coordonne-t-il les activités de réponse à l’épidémie avec le MINSANTE, les partenaires et le public pour assurer l’alignement de la stratégie ?
TECH-054	Technical	Middle management	Surveillance & Riposte	Monitoring and Evaluation Strategy Development and Integration	Élaboration et intégration de la stratégie de suivi et d'évaluation	How effectively do you lead the formulation of the M&E strategy, oversee the monitoring plan, and ensure alignment with program objectives?	How effectively does your subordinate lead the formulation of the M&E strategy, oversee the monitoring plan, and ensure alignment with program objectives?	Dans quelle mesure dirigez-vous efficacement la formulation de la stratégie de S&E, supervisez-vous le plan de suivi et assurez-vous son alignement avec les objectifs du programme ?	Dans quelle mesure votre subordonné dirige-t-il efficacement la formulation de la stratégie de S&E, supervise-t-il le plan de suivi et assure-t-il l’alignement avec les objectifs du programme ?
TECH-055	Technical	Middle management	Planification et Suivi-Évaluation	Performance Monitoring and Reporting	Suivi et rapports de performance	To what extent do you oversee the monitoring of PEV strategic plans, ensuring timely and accurate reporting?	To what extent does your subordinate oversee the monitoring of PEV strategic plans, ensuring timely and accurate reporting?	Dans quelle mesure supervisez-vous le suivi des plans stratégiques du PEV, en garantissant des rapports opportuns et précis ?	Dans quelle mesure votre subordonné supervise-t-il le suivi des plans stratégiques du PEV, garantissant ainsi des rapports opportuns et précis ?
TECH-056	Technical	Middle management	Planification et Suivi-Évaluation	Documentation, and Knowledge Management	Documentation et gestion des connaissances	To what extent do you coordinate PEV reporting, ensuring documentation accuracy and implementation of recommendations?	To what extent does your subordinate coordinate PEV reporting, ensuring documentation accuracy and implementation of recommendations?	Dans quelle mesure coordonnez-vous les rapports PEV, en garantissant l’exactitude de la documentation et la mise en œuvre des recommandations ?	Dans quelle mesure votre subordonné coordonne-t-il les rapports PEV, garantissant l'exactitude de la documentation et la mise en œuvre des recommandations ?
TECH-057	Technical	Middle management	Planification et Suivi-Évaluation	Annual Work Plan Development and Updates	Élaboration et mises à jour du plan de travail annuel	How well do you lead the development and periodic revision of the PEV Annual Work Plan to align with national immunization goals?	How well does your subordinate lead the development and periodic revision of the PEV Annual Work Plan to align with national immunization goals?	Dans quelle mesure dirigez-vous l’élaboration et la révision périodique du plan de travail annuel du PEV pour l’aligner sur les objectifs nationaux de vaccination ?	Dans quelle mesure votre subordonné dirige-t-il l’élaboration et la révision périodique du plan de travail annuel du PEV pour l’aligner sur les objectifs nationaux de vaccination ?
TECH-058	Technical	Middle management	Planification et Suivi-Évaluation	Operational Timetable Coordination	Coordination du calendrier opérationnel	How well do you oversee the development and updates of the operational timetable, ensuring seamless integration with the Annual Work Plan?	How well does your subordinate oversee the development and updates of the operational timetable, ensuring seamless integration with the Annual Work Plan?	Dans quelle mesure supervisez-vous l’élaboration et les mises à jour du calendrier opérationnel, en garantissant une intégration transparente avec le plan de travail annuel ?	Dans quelle mesure votre subordonné supervise-t-il l’élaboration et les mises à jour du calendrier opérationnel, garantissant ainsi une intégration transparente avec le plan de travail annuel ?
TECH-059	Technical	Middle management	Planification et Suivi-Évaluation	Cross-Section Collaboration and Coordination	Collaboration et coordination transversales	How well do you ensure effective collaboration with other sections for the development and revision of the PPAC and other planning activities, fostering alignment and efficient execution?	How well does your subordinate ensure effective collaboration with other sections for the development and revision of the PPAC and other planning activities, fostering alignment and efficient execution?	Dans quelle mesure assurez-vous une collaboration efficace avec d’autres sections pour l’élaboration et la révision du PPAC et d’autres activités de planification, favorisant ainsi l’alignement et une exécution efficace ?	Dans quelle mesure votre subordonné assure-t-il une collaboration efficace avec d’autres sections pour l’élaboration et la révision du PPAC et d’autres activités de planification, favorisant ainsi l’alignement et une exécution efficace ?
TECH-060	Technical	Middle management	Data management	Data quality and validation	Qualité et validation des données	To what extent do you oversee the validation and quality assurance of PEV data, ensuring adherence to required standards?	To what extent does your subordinate oversee the validation and quality assurance of PEV data, ensuring adherence to required standards?	Dans quelle mesure supervisez-vous la validation et l’assurance qualité des données PEV, en garantissant le respect des normes requises ?	Dans quelle mesure votre subordonné supervise-t-il la validation et l’assurance qualité des données PEV, garantissant le respect des normes requises ?
TECH-061	Technical	Middle management	Data management	Timeliness of reports and statistical analyses	Actualité des rapports et des analyses statistiques	How effectively do you ensure the timely production and submission of all statistical analyses, routine situation reports, and data review reports, coordinating with other sections to meet deadlines?	How effectively does your subordinate ensure the timely production and submission of all statistical analyses, routine situation reports, and data review reports, coordinating with other sections to meet deadlines?	Dans quelle mesure assurez-vous efficacement la production en temps voulu des analyses statistiques, rapports de situation et rapports d’examen des données ?	Dans quelle mesure votre subordonné assure-t-il efficacement la production et la soumission en temps voulu de toutes les analyses statistiques, des rapports de situation de routine et des rapports d'examen des données, en coordination avec d'autres sections pour respecter les délais ?
TECH-062	Technical	Middle management	Data management	Knowledge management and system oversight	Gestion des connaissances et surveillance du système	How well do you oversee the development and management of the PEV information system, IT master plan, and data management tools, ensuring alignment with organizational goals and the integration of knowledge-sharing practices?	How well does your subordinate oversee the development and management of the PEV information system, IT master plan, and data management tools, ensuring alignment with organizational goals and the integration of knowledge-sharing practices?	Dans quelle mesure supervisez-vous le développement et la gestion du système d’information du PEV, du plan directeur informatique et des outils de gestion des données ?	Dans quelle mesure votre subordonné supervise-t-il le développement et la gestion du système d’information PEV, du plan directeur informatique et des outils de gestion des données, en garantissant l’alignement avec les objectifs organisationnels et l’intégration des pratiques de partage des connaissances ?
TECH-063	Technical	Middle management	Data management	Data Utilization for Decision-Making	Utilisation des données pour la prise de décision	How well do you lead the interpretation of data insights, developing actionable recommendations to inform senior leadership decisions?	How well does your subordinate lead the interpretation of data insights, developing actionable recommendations to inform senior leadership decisions?	Dans quelle mesure dirigez-vous l’interprétation des données, en élaborant des recommandations concrètes pour éclairer les décisions de la haute direction ?	Dans quelle mesure votre subordonné dirige-t-il l’interprétation des données, en élaborant des recommandations exploitables pour éclairer les décisions de la haute direction ?
TECH-064	Technical	Middle management	Communication	Integrated Communication and Digital Marketing Planning	Planification intégrée de la communication et du marketing numérique	To what extent do you lead the development and execution of integrated communication plans, ensuring alignment with program objectives?	To what extent does your subordinate lead the development and execution of integrated communication plans, ensuring alignment with program objectives?	Dans quelle mesure dirigez-vous l’élaboration et l’exécution de plans de communication intégrés, en veillant à leur alignement avec les objectifs du programme ?	Dans quelle mesure votre subordonné dirige-t-il l’élaboration et l’exécution de plans de communication intégrés, garantissant ainsi l’alignement avec les objectifs du programme ?
TECH-065	Technical	Middle management	Communication	Community Engagement and Mobilization	Engagement et mobilisation communautaires	To what extent do you oversee community mobilization efforts, engaging stakeholders, and ensuring active participation of local groups, advocates, and vaccination champions to enhance campaign impact?	To what extent does your subordinate oversee community mobilization efforts, engaging stakeholders, and ensuring active participation of local groups, advocates, and vaccination champions to enhance campaign impact?	Dans quelle mesure supervisez-vous les efforts de mobilisation communautaire, engagez-vous les parties prenantes et assurez-vous la participation active des groupes locaux, des défenseurs et des champions de la vaccination pour améliorer l’impact de la campagne ?	Dans quelle mesure votre subordonné supervise-t-il les efforts de mobilisation communautaire, engage-t-il les parties prenantes et assure-t-il la participation active des groupes locaux, des défenseurs et des champions de la vaccination pour améliorer l'impact de la campagne ?
TECH-066	Technical	Middle management	Communication	Monitoring and Reporting	Suivi et rapports	To what extent do you supervise the monitoring of communication strategies, ensuring comprehensive documentation for decision-making?	To what extent does your subordinate supervise the monitoring of communication strategies, ensuring comprehensive documentation for decision-making?	Dans quelle mesure supervisez-vous le suivi des stratégies de communication, en garantissant une documentation complète pour la prise de décision ?	Dans quelle mesure votre subordonné supervise-t-il le suivi des stratégies de communication, en garantissant une documentation complète pour la prise de décision ?
TECH-067	Technical	Middle management	Communication	Policy Advocacy and Strategic Planning	Plaidoyer politique et planification stratégique	To what extent do you lead policy advocacy efforts, ensuring vaccination is prioritized in national agendas and funding strategies?	To what extent does your subordinate lead policy advocacy efforts, ensuring vaccination is prioritized in national agendas and funding strategies?	Dans quelle mesure dirigez-vous les efforts de plaidoyer politique, en veillant à ce que la vaccination soit prioritaire dans les programmes nationaux et les stratégies de financement ?	Dans quelle mesure votre subordonné dirige-t-il les efforts de plaidoyer politique, en veillant à ce que la vaccination soit prioritaire dans les programmes nationaux et les stratégies de financement ?
TECH-068	Technical	Middle management	Communication	Partnership Development and Resource Mobilization	Développement de partenariats et mobilisation des ressources	How well do you lead efforts to secure agreements with cooperation agencies, businesses, and donors, fostering intersectoral collaborations and mobilizing resources for vaccination campaigns?	How well does your subordinate lead efforts to secure agreements with cooperation agencies, businesses, and donors, fostering intersectoral collaborations and mobilizing resources for vaccination campaigns?	Dans quelle mesure dirigez-vous les efforts visant à conclure des accords avec les agences de coopération, les entreprises et les donateurs, à favoriser les collaborations intersectorielles et à mobiliser des ressources pour les campagnes de vaccination ?	Dans quelle mesure votre subordonné dirige-t-il les efforts visant à conclure des accords avec des agences de coopération, des entreprises et des donateurs, à favoriser les collaborations intersectorielles et à mobiliser des ressources pour les campagnes de vaccination ?
TECH-069	Technical	Middle management	Communication	Monitoring, Capacity Building, and Reporting	Suivi, renforcement des capacités et rapports	To what extent do you oversee capacity building for local partnerships, evaluates the performance of vaccination platforms, and ensures timely submission of comprehensive advocacy and partnership reports?	To what extent does your subordinate oversee capacity building for local partnerships, evaluates the performance of vaccination platforms, and ensures timely submission of comprehensive advocacy and partnership reports?	Dans quelle mesure supervisez-vous le renforcement des capacités des partenariats locaux, évaluez-vous les performances des plateformes de vaccination et assurez-vous la soumission en temps voulu de rapports complets de plaidoyer et de partenariat ?	Dans quelle mesure votre subordonné supervise-t-il le renforcement des capacités des partenariats locaux, évalue-t-il les performances des plateformes de vaccination et assure-t-il la soumission en temps voulu de rapports complets de plaidoyer et de partenariat ?
TECH-070	Technical	Middle management	Finance	Financial Oversight and Accuracy	Surveillance et exactitude financières	To what extent do you oversee financial oversight, ensuring that all expenditures are compliant with PEV procedures and that financial data is consistently accurate, providing guidance on resource allocation?	To what extent does your subordinate oversee financial oversight, ensuring that all expenditures are compliant with PEV procedures and that financial data is consistently accurate, providing guidance on resource allocation?	Dans quelle mesure supervisez-vous la surveillance financière, en veillant à ce que toutes les dépenses soient conformes aux procédures PEV et que les données financières soient toujours exactes, en fournissant des conseils sur l'allocation des ressources ?	Dans quelle mesure votre subordonné supervise-t-il la surveillance financière, en veillant à ce que toutes les dépenses soient conformes aux procédures PEV et que les données financières soient toujours exactes, en fournissant des conseils sur l'allocation des ressources ?	Level was blank in source file; assigned to Middle Management based on adjacent Finance/management grouping.
TECH-071	Technical	Middle management	Finance	Budgeting and Financial Reporting	Budgétisation et rapports financiers	How effectively do you lead the development and review of the annual and quarterly budgets, ensuring that financial reports are prepared on time and in line with PEV's objectives?	How effectively does your subordinate lead the development and review of the annual and quarterly budgets, ensuring that financial reports are prepared on time and in line with PEV's objectives?	Dans quelle mesure dirigez-vous efficacement l’élaboration et l’examen des budgets annuels et trimestriels, en veillant à ce que les rapports financiers soient préparés à temps et conformément aux objectifs de PEV ?	Dans quelle mesure votre subordonné dirige-t-il efficacement l'élaboration et l'examen des budgets annuels et trimestriels, en veillant à ce que les rapports financiers soient préparés à temps et conformément aux objectifs de PEV ?	Level was blank in source file; assigned to Middle Management based on adjacent Finance/management grouping.
TECH-072	Technical	Middle management	Finance	Compliance and Audit Preparation	Conformité et préparation à l'audit	How effectively do you ensure that all financial operations comply with regulatory standards, oversees internal controls, and prepares for external audits, making sure corrective actions are implemented when necessary?	How effectively does your subordinate ensure that all financial operations comply with regulatory standards, oversees internal controls, and prepares for external audits, making sure corrective actions are implemented when necessary?	Dans quelle mesure assurez-vous que les opérations financières respectent les normes réglementaires et supervisez-vous les contrôles internes ?	Dans quelle mesure votre subordonné s'assure-t-il efficacement que toutes les opérations financières sont conformes aux normes réglementaires, supervise les contrôles internes et se prépare aux audits externes, en s'assurant que des mesures correctives sont mises en œuvre si nécessaire ?	Level was blank in source file; assigned to Middle Management based on adjacent Finance/management grouping.
TECH-073	Technical	Middle management	Finance	Policy Compliance and Implementation	Conformité et mise en œuvre des politiques	To what extent do you enforce adherence to HR policies within the EPI system and address violations effectively?	To what extent does your subordinate enforce adherence to HR policies within the EPI system and address violations effectively?	Dans quelle mesure appliquez-vous le respect des politiques RH au sein du système EPI et traitez-vous efficacement les violations ?	Dans quelle mesure votre subordonné applique-t-il le respect des politiques RH au sein du système PEV et traite-t-il efficacement les violations ?	Level was blank in source file; assigned to Middle Management based on adjacent Finance/management grouping.
TECH-074	Technical	Middle management	Finance	Procurement Planning and Documentation Management	Planification des achats et gestion de la documentation	How effectively do you lead the preparation and updating of procurement plans, oversees the preparation of tender documents, and ensures all documents for the award of contracts are properly archived for audit purposes?	How effectively does your subordinate lead the preparation and updating of procurement plans, oversees the preparation of tender documents, and ensures all documents for the award of contracts are properly archived for audit purposes?	Dans quelle mesure dirigez-vous efficacement la préparation et la mise à jour des plans d’approvisionnement, ainsi que la supervision des documents d’appel d’offres ?	Dans quelle mesure votre subordonné dirige-t-il efficacement la préparation et la mise à jour des plans d’approvisionnement, supervise-t-il la préparation des documents d’appel d’offres et s’assure-t-il que tous les documents relatifs à l’attribution des contrats sont correctement archivés à des fins d’audit ?	Level was blank in source file; assigned to Middle Management based on adjacent Finance/management grouping.
TECH-075	Technical	Middle management	Finance	Contract Execution and Compliance Monitoring	Exécution des contrats et suivi de la conformité	To what extent do you supervise the execution, supervision, and compliance with contracts, monitors disputes and payments, and ensures compliance with regulatory texts, conventions, and laws?	To what extent does your subordinate supervise the execution, supervision, and compliance with contracts, monitors disputes and payments, and ensures compliance with regulatory texts, conventions, and laws?	Dans quelle mesure supervisez-vous l'exécution, la supervision et le respect des contrats, surveillez-vous les litiges et les paiements et assurez-vous le respect des textes réglementaires, des conventions et des lois ?	Dans quelle mesure votre subordonné supervise-t-il l'exécution, la supervision et le respect des contrats, surveille les litiges et les paiements et assure-t-il le respect des textes réglementaires, des conventions et des lois ?	Level was blank in source file; assigned to Middle Management based on adjacent Finance/management grouping.
TECH-076	Technical	Middle management	Finance	Supplier and Vendor Management	Gestion des fournisseurs et des vendeurs	To what extent do you oversee the management of the supplier database, validates the technical standards and specifications for acquisitions, and tracks procurement orders to ensure compliance with agreements and contracts?	To what extent does your subordinate oversee the management of the supplier database, validates the technical standards and specifications for acquisitions, and tracks procurement orders to ensure compliance with agreements and contracts?	Dans quelle mesure supervisez-vous la gestion de la base de données des fournisseurs, validez-vous les normes et spécifications techniques des acquisitions et suivez-vous les commandes d'approvisionnement pour garantir le respect des accords et des contrats ?	Dans quelle mesure votre subordonné supervise-t-il la gestion de la base de données des fournisseurs, valide-t-il les normes et spécifications techniques des acquisitions et suit-il les commandes d’approvisionnement pour garantir le respect des accords et des contrats ?	Level was blank in source file; assigned to Middle Management based on adjacent Finance/management grouping.
TECH-077	Technical	Middle management	Human resource	Personnel management	Gestion du personnel	How well do you oversee personnel record management across the unit, ensuring that all records meet organizational standards and facilitating timely updates where discrepancies are identified?	How well does your subordinate oversee personnel record management across the unit, ensuring that all records meet organizational standards and facilitating timely updates where discrepancies are identified?	À quel point supervisez-vous la gestion des dossiers du personnel, en assurant leur conformité et des mises à jour rapides en cas d’écart ?	Dans quelle mesure votre subordonné supervise-t-il la gestion des dossiers du personnel dans l'ensemble de l'unité, en veillant à ce que tous les dossiers répondent aux normes organisationnelles et en facilitant les mises à jour en temps opportun lorsque des écarts sont identifiés ?
TECH-078	Technical	Middle management	Human resource	Employee Performance Monitoring	Suivi des performances des employés	How well do you analyze trends in employee performance metrics, develops action plans to address issues like poor attendance, and provides performance reports to senior leadership for decision-making?	How well does your subordinate analyze trends in employee performance metrics, develops action plans to address issues like poor attendance, and provides performance reports to senior leadership for decision-making?	À quel point analysez-vous les tendances de performance, élaborez-vous des plans d’action, et fournissez-vous des rapports à la direction ?	Dans quelle mesure votre subordonné analyse-t-il les tendances des indicateurs de performance des employés, élabore-t-il des plans d’action pour résoudre des problèmes tels que la faible assiduité et fournit-il des rapports de performance à la haute direction pour la prise de décision ?
TECH-079	Technical	Middle management	Human resource	Capacity-Building and Development	Renforcement des capacités et développement	To what extent do you review and validate capacity-building activity reports, aligning training initiatives with organizational goals, and ensuring all planned activities are executed?	To what extent does your subordinate review and validate capacity-building activity reports, aligning training initiatives with organizational goals, and ensuring all planned activities are executed?	À quel point validez-vous les rapports de formation, en alignant les activités sur les objectifs et en assurant leur exécution ?	Dans quelle mesure votre subordonné examine-t-il et valide-t-il les rapports d’activités de renforcement des capacités, en alignant les initiatives de formation sur les objectifs organisationnels et en s’assurant que toutes les activités planifiées sont exécutées ?
TECH-080	Technical	Middle management	Human resource	Resource and Allowance Management	Gestion des ressources et des allocations	To what extent do you oversee HR-controlled resources, ensuring efficient allocation and compliance with guidelines?	To what extent does your subordinate oversee HR-controlled resources, ensuring efficient allocation and compliance with guidelines?	Dans quelle mesure supervisez-vous les ressources contrôlées par les RH, en garantissant une allocation efficace et le respect des directives ?	Dans quelle mesure votre subordonné supervise-t-il les ressources contrôlées par les RH, garantissant une répartition efficace et le respect des directives ?
TECH-081	Technical	Support staff	Logistique et Maintenance	Data Collection and Analysis Accuracy	Précision de la collecte et de l'analyse des données	How well do you accurately collect and submit routine vaccination data, ensuring consistency and completeness in alignment with established reporting standards?	How well does your subordinate accurately collect and submit routine vaccination data, ensuring consistency and completeness in alignment with established reporting standards?	Dans quelle mesure collectez-vous et soumettez-vous avec précision les données de vaccination de routine, en garantissant la cohérence et l’exhaustivité conformément aux normes de déclaration établies ?	Dans quelle mesure votre subordonné collecte-t-il et soumet-il avec précision les données de vaccination de routine, garantissant ainsi la cohérence et l’exhaustivité conformément aux normes de rapport établies ?
TECH-082	Technical	Support staff	Logistique et Maintenance	Monitoring and Supervision of Routine Vaccination Activities	Suivi et supervision des activités de vaccination de routine	To what extent do you assist in monitoring and evaluating routine vaccination activities to ensure they align with established guidelines and are executed as planned?	To what extent does your subordinate assist in monitoring and evaluating routine vaccination activities to ensure they align with established guidelines and are executed as planned?	Dans quelle mesure contribuez-vous au suivi et à l’évaluation des activités de vaccination de routine pour garantir qu’elles sont conformes aux directives établies et qu’elles sont exécutées comme prévu ?	Dans quelle mesure votre subordonné contribue-t-il au suivi et à l’évaluation des activités de vaccination de routine pour garantir qu’elles sont conformes aux directives établies et qu’elles sont exécutées comme prévu ?
TECH-083	Technical	Support staff	Logistique et Maintenance	Creative Strategy Development for Routine Vaccination Performance	Développement d'une stratégie créative pour la performance de la vaccination de routine	How well do you participate in developing and implementing vaccination acceleration strategies for underperforming areas, contributing ideas for improvement?	How well does your subordinate participate in developing and implementing vaccination acceleration strategies for underperforming areas, contributing ideas for improvement?	Dans quelle mesure participez-vous à l’élaboration et à la mise en œuvre de stratégies d’accélération de la vaccination dans les zones sous-performantes, en apportant des idées d’amélioration ?	Dans quelle mesure votre subordonné participe-t-il à l’élaboration et à la mise en œuvre de stratégies d’accélération de la vaccination dans les zones sous-performantes, en apportant des idées d’amélioration ?
TECH-084	Technical	Support staff	Logistique et Maintenance	Efficient Planning and Implementation of Preventive Immunization Campaigns	Planification et mise en œuvre efficaces des campagnes de vaccination préventive	How well do you assist in the preparation and execution of preventive immunization campaigns, ensuring logistics, supplies, and staff are effectively organized?	How well does your subordinate assist in the preparation and execution of preventive immunization campaigns, ensuring logistics, supplies, and staff are effectively organized?	Dans quelle mesure contribuez-vous à la préparation et à l’exécution des campagnes de vaccination préventive, en veillant à ce que la logistique, les fournitures et le personnel soient organisés efficacement ?	Dans quelle mesure votre subordonné contribue-t-il à la préparation et à l’exécution des campagnes de vaccination préventive, en veillant à ce que la logistique, les fournitures et le personnel soient organisés efficacement ?
TECH-085	Technical	Support staff	Logistique et Maintenance	Introduction, Monitoring, and Evaluation of New Vaccines	Introduction, suivi et évaluation des nouveaux vaccins	How well do you support the introduction of new vaccines by ensuring necessary documentation, training, and supplies are in place and monitors implementation, reporting on coverage and any issues?	How well does your subordinate support the introduction of new vaccines by ensuring necessary documentation, training, and supplies are in place and monitors implementation, reporting on coverage and any issues?	Dans quelle mesure soutenez-vous l’introduction des nouveaux vaccins en assurant préparation, suivi et rapport ?	Dans quelle mesure votre subordonné soutient-il l’introduction de nouveaux vaccins en s’assurant que la documentation, la formation et les fournitures nécessaires sont en place et surveille la mise en œuvre, en rendant compte de la couverture et de tout problème ?
TECH-086	Technical	Support staff	Logistique et Maintenance	Data Accuracy and Reporting for Newly Introduced Vaccines	Exactitude des données et rapports sur les vaccins nouvellement introduits	How well do you ensure the accuracy and timeliness of data related to newly introduced vaccines, including coverage rates and reports on adverse events?	How well does your subordinate ensure the accuracy and timeliness of data related to newly introduced vaccines, including coverage rates and reports on adverse events?	Dans quelle mesure garantissez-vous l’exactitude et l’actualité des données relatives aux nouveaux vaccins introduits, y compris les taux de couverture et les rapports sur les événements indésirables ?	Dans quelle mesure votre subordonné garantit-il l’exactitude et l’actualité des données relatives aux nouveaux vaccins introduits, y compris les taux de couverture et les rapports sur les événements indésirables ?
TECH-087	Technical	Support staff	Logistique et Maintenance	Vaccine Procurement Management	Gestion de l'approvisionnement en vaccins	How well do you ensure proper procedures for vaccine procurement, including verifying shipment details and submitting arrival reports promptly?	How well does your subordinate ensure proper procedures for vaccine procurement, including verifying shipment details and submitting arrival reports promptly?	Dans quelle mesure assurez-vous des procédures appropriées pour l’approvisionnement en vaccins, notamment la vérification des détails de l’expédition et la soumission rapide des rapports d’arrivée ?	Dans quelle mesure votre subordonné garantit-il des procédures appropriées pour l’approvisionnement en vaccins, notamment la vérification des détails de l’expédition et la soumission rapide des rapports d’arrivée ?
TECH-088	Technical	Support staff	Logistique et Maintenance	Vaccine Stock Management	Gestion des stocks de vaccins	How well do you conduct quarterly vaccine stock checks and update inventory management tools to ensure accuracy?	How well does your subordinate conduct quarterly vaccine stock checks and update inventory management tools to ensure accuracy?	Dans quelle mesure effectuez-vous des contrôles trimestriels des stocks de vaccins et mettez-vous à jour les outils de gestion des stocks pour garantir l’exactitude ?	Dans quelle mesure votre subordonné effectue-t-il des contrôles trimestriels des stocks de vaccins et met-il à jour les outils de gestion des stocks pour garantir l’exactitude ?
TECH-089	Technical	Support staff	Logistique et Maintenance	Regional Vaccine Distribution	Distribution régionale des vaccins	How well do you prepare vaccines for regional distribution, ensuring accurate handling and timely delivery?	How well does your subordinate prepare vaccines for regional distribution, ensuring accurate handling and timely delivery?	Dans quelle mesure préparez-vous les vaccins pour la distribution régionale, en garantissant une manipulation précise et une livraison dans les délais ?	Dans quelle mesure votre subordonné prépare-t-il les vaccins pour la distribution régionale, en garantissant une manipulation précise et une livraison dans les délais ?
TECH-090	Technical	Support staff	Logistique et Maintenance	Data Analysis and Feedback	Analyse des données et rétroaction	How well do you collect and analyze regional deliverables, including inventory reports and distribution updates, to provide actionable feedback?	How well does your subordinate collect and analyze regional deliverables, including inventory reports and distribution updates, to provide actionable feedback?	Dans quelle mesure collectez-vous et analysez-vous efficacement les livrables régionaux, y compris les rapports d’inventaire et les mises à jour de distribution, pour fournir des commentaires exploitables ?	Dans quelle mesure votre subordonné collecte-t-il et analyse-t-il efficacement les livrables régionaux, y compris les rapports d’inventaire et les mises à jour de distribution, pour fournir des commentaires exploitables ?
TECH-091	Technical	Support staff	Logistique et Maintenance	Equipment Inventory and Deployment	Inventaire et déploiement des équipements	How well do you assist in maintaining an up-to-date inventory of PEV equipment, ensuring accurate records of deployment?	How well does your subordinate assist in maintaining an up-to-date inventory of PEV equipment, ensuring accurate records of deployment?	Dans quelle mesure contribuez-vous à maintenir un inventaire à jour des équipements PEV, garantissant ainsi des enregistrements précis du déploiement ?	Dans quelle mesure votre subordonné contribue-t-il à maintenir un inventaire à jour des équipements PEV, garantissant ainsi des enregistrements précis du déploiement ?
TECH-092	Technical	Support staff	Logistique et Maintenance	PEV Equipment Maintenance	Maintenance des équipements PEV	To what extent do you assist in implementing the maintenance schedule, diagnosing equipment malfunctions, and coordinating repairs?	To what extent does your subordinate assist in implementing the maintenance schedule, diagnosing equipment malfunctions, and coordinating repairs?	Dans quelle mesure contribuez-vous à la mise en œuvre du calendrier de maintenance, au diagnostic des dysfonctionnements de l’équipement et à la coordination des réparations ?	Dans quelle mesure votre subordonné aide-t-il à mettre en œuvre le calendrier de maintenance, à diagnostiquer les dysfonctionnements de l’équipement et à coordonner les réparations ?
TECH-093	Technical	Support staff	Logistique et Maintenance	Reporting and Monitoring of Equipment Usage	Rapports et suivi de l'utilisation des équipements	How well do you prepare reports on equipment status, usage, and completed maintenance tasks, ensuring accurate data logging?	How well does your subordinate prepare reports on equipment status, usage, and completed maintenance tasks, ensuring accurate data logging?	Dans quelle mesure préparez-vous des rapports sur l’état de l’équipement, son utilisation et les tâches de maintenance terminées, garantissant ainsi une journalisation précise des données ?	Dans quelle mesure votre subordonné prépare-t-il des rapports sur l’état de l’équipement, son utilisation et les tâches de maintenance terminées, garantissant ainsi une journalisation précise des données ?
TECH-094	Technical	Support staff	Surveillance & Riposte	Surveillance and Epidemic Response	Surveillance et réponse aux épidémies	How well do you assist in collecting data, tracking outbreaks, and ensuring proper documentation of suspected epidemics?	How well does your subordinate assist in collecting data, tracking outbreaks, and ensuring proper documentation of suspected epidemics?	Dans quelle mesure contribuez-vous à la collecte de données, au suivi des épidémies et à la garantie d’une documentation appropriée des épidémies suspectées ?	Dans quelle mesure votre subordonné contribue-t-il à la collecte de données, au suivi des épidémies et à la garantie d’une documentation appropriée des épidémies suspectées ?
TECH-095	Technical	Support staff	Surveillance & Riposte	AEFI Surveillance and Communication	Surveillance et communication des MAPI	How effectively do you monitor communication channels for adverse events following immunization (AEFI) reports, update databases, and ensure timely reporting of AEFI cases?	How effectively does your subordinate monitor communication channels for adverse events following immunization (AEFI) reports, update databases, and ensure timely reporting of AEFI cases?	Comment surveillez-vous les canaux de communication et mettez-vous à jour les bases de données pour les rapports MAPI ?	Dans quelle mesure votre subordonné surveille-t-il efficacement les canaux de communication pour les rapports d’événements indésirables après la vaccination (EIPV), met-il à jour les bases de données et assure-t-il la notification en temps opportun des cas d’EIPV ?
TECH-096	Technical	Support staff	Surveillance & Riposte	Capacity Building and Stakeholder Coordination	Renforcement des capacités et coordination des parties prenantes	How well do you assist in organizing training sessions for healthcare providers to ensure compliance with surveillance procedures?	How well does your subordinate assist in organizing training sessions for healthcare providers to ensure compliance with surveillance procedures?	Dans quelle mesure contribuez-vous à l’organisation de séances de formation pour les prestataires de soins de santé afin de garantir le respect des procédures de surveillance ?	Dans quelle mesure votre subordonné contribue-t-il à l’organisation de séances de formation pour les prestataires de soins de santé afin de garantir le respect des procédures de surveillance ?
TECH-097	Technical	Support staff	Surveillance & Riposte	Epidemic Surveillance and Monitoring	Surveillance et suivi des épidémies	How effectively do you assist in monitoring epidemiological data, tracking outbreaks, and ensuring accurate reporting of epidemic cases?	How effectively does your subordinate assist in monitoring epidemiological data, tracking outbreaks, and ensuring accurate reporting of epidemic cases?	Dans quelle mesure contribuez-vous efficacement à la surveillance des données épidémiologiques, au suivi des épidémies et à la garantie d’un signalement précis des cas épidémiques ?	Dans quelle mesure votre subordonné contribue-t-il efficacement à la surveillance des données épidémiologiques, au suivi des épidémies et à la garantie d’un signalement précis des cas épidémiques ?
TECH-098	Technical	Support staff	Surveillance & Riposte	Epidemic Investigation and Control Strategy Implementation	Mise en œuvre de la stratégie d'investigation et de contrôle des épidémies	How well do you support investigation efforts in affected areas and assist in implementing epidemic control measures?	How well does your subordinate support investigation efforts in affected areas and assist in implementing epidemic control measures?	Dans quelle mesure soutenez-vous les efforts d’enquête dans les zones touchées et aidez-vous à mettre en œuvre des mesures de contrôle des épidémies ?	Dans quelle mesure votre subordonné soutient-il les efforts d’enquête dans les zones touchées et aide-t-il à mettre en œuvre des mesures de contrôle de l’épidémie ?
TECH-099	Technical	Support staff	Surveillance & Riposte	Coordination and Communication with Stakeholders	Coordination et communication avec les parties prenantes	How effectively do you support communication and coordination efforts between the epidemic response unit and relevant stakeholders?	How effectively does your subordinate support communication and coordination efforts between the epidemic response unit and relevant stakeholders?	Dans quelle mesure soutenez-vous efficacement les efforts de communication et de coordination entre l’unité de réponse à l’épidémie et les parties prenantes concernées ?	Dans quelle mesure votre subordonné soutient-il efficacement les efforts de communication et de coordination entre l’unité de réponse à l’épidémie et les parties prenantes concernées ?
TECH-100	Technical	Support staff	Surveillance & Riposte	Monitoring and Evaluation Strategy Development and Integration	Élaboration et intégration de la stratégie de suivi et d'évaluation	How well do you assist in developing and implementing M&E tools to align with the PEV logical framework?	How well does your subordinate assist in developing and implementing M&E tools to align with the PEV logical framework?	Dans quelle mesure contribuez-vous à l’élaboration et à la mise en œuvre d’outils de S&E conformes au cadre logique du PEV ?	Dans quelle mesure votre subordonné contribue-t-il à l’élaboration et à la mise en œuvre d’outils de S&E conformes au cadre logique du PEV ?
TECH-101	Technical	Support staff	Planification et Suivi-Évaluation	Performance Monitoring and Reporting	Suivi et rapports de performance	How effectively do you support the collection of data for monitoring PEV performance and ensure accurate reporting?	How effectively does your subordinate support the collection of data for monitoring PEV performance and ensure accurate reporting?	Dans quelle mesure soutenez-vous efficacement la collecte de données pour surveiller les performances du PEV et garantir des rapports précis ?	Dans quelle mesure votre subordonné soutient-il efficacement la collecte de données pour surveiller les performances du PEV et garantir des rapports précis ?
TECH-102	Technical	Support staff	Planification et Suivi-Évaluation	Documentation, and Knowledge Management	Documentation et gestion des connaissances	How effectively do you assist in organizing and documenting PEV activities, preparing reports, and tracking implementation of recommendations?	How effectively does your subordinate assist in organizing and documenting PEV activities, preparing reports, and tracking implementation of recommendations?	Dans quelle mesure contribuez-vous efficacement à l’organisation et à la documentation des activités PEV, à la préparation des rapports et au suivi de la mise en œuvre des recommandations ?	Dans quelle mesure votre subordonné contribue-t-il efficacement à l’organisation et à la documentation des activités PEV, à la préparation des rapports et au suivi de la mise en œuvre des recommandations ?
TECH-103	Technical	Support staff	Planification et Suivi-Évaluation	Annual Work Plan Development and Updates	Élaboration et mises à jour du plan de travail annuel	How effectively do you assist in drafting, revising, and updating the PEV Annual Work Plan to align with program goals?	How effectively does your subordinate assist in drafting, revising, and updating the PEV Annual Work Plan to align with program goals?	Dans quelle mesure contribuez-vous efficacement à la rédaction, à la révision et à la mise à jour du plan de travail annuel du PEV pour l’aligner sur les objectifs du programme ?	Dans quelle mesure votre subordonné contribue-t-il efficacement à la rédaction, à la révision et à la mise à jour du plan de travail annuel du PEV pour l'aligner sur les objectifs du programme ?
TECH-104	Technical	Support staff	Planification et Suivi-Évaluation	Operational Timetable Coordination	Coordination du calendrier opérationnel	How well do you support the preparation and updating of the operational timetable, ensuring deadlines and milestones are clearly defined and communicated?	How well does your subordinate support the preparation and updating of the operational timetable, ensuring deadlines and milestones are clearly defined and communicated?	Dans quelle mesure soutenez-vous la préparation et la mise à jour du calendrier opérationnel, en veillant à ce que les délais et les jalons soient clairement définis et communiqués ?	Dans quelle mesure votre subordonné soutient-il la préparation et la mise à jour du calendrier opérationnel, en veillant à ce que les délais et les jalons soient clairement définis et communiqués ?
TECH-105	Technical	Support staff	Planification et Suivi-Évaluation	Cross-Section Collaboration and Coordination	Collaboration et coordination transversales	How effectively do you facilitate communication and coordination between sections during the development and revision of planning documents?	How effectively does your subordinate facilitate communication and coordination between sections during the development and revision of planning documents?	Dans quelle mesure facilitez-vous efficacement la communication et la coordination entre les sections lors de l’élaboration et de la révision des documents de planification ?	Dans quelle mesure votre subordonné facilite-t-il efficacement la communication et la coordination entre les sections lors de l’élaboration et de la révision des documents de planification ?
TECH-106	Technical	Support staff	Data management	Data quality and validation	Qualité et validation des données	How well do you ensure the centralization, validation, and storage of PEV data to maintain accuracy and consistency across routine and monitoring reports?	How well does your subordinate ensure the centralization, validation, and storage of PEV data to maintain accuracy and consistency across routine and monitoring reports?	Dans quelle mesure assurez-vous la centralisation, la validation et le stockage des données PEV afin de maintenir l’exactitude et la cohérence des rapports de routine et de surveillance ?	Dans quelle mesure votre subordonné assure-t-il la centralisation, la validation et le stockage des données PEV afin de maintenir l'exactitude et la cohérence des rapports de routine et de surveillance ?
TECH-107	Technical	Support staff	Data management	Timeliness of reports and statistical analyses	Actualité des rapports et des analyses statistiques	How effectively do you prepare and submit routine situation reports, monitoring reports, and statistical analyses on time?	How effectively does your subordinate prepare and submit routine situation reports, monitoring reports, and statistical analyses on time?	Dans quelle mesure préparez-vous et soumettez-vous efficacement les rapports de situation de routine, les rapports de suivi et les analyses statistiques dans les délais impartis ?	Dans quelle mesure votre subordonné prépare-t-il et soumet-il efficacement des rapports de situation de routine, des rapports de suivi et des analyses statistiques dans les délais impartis ?
TECH-108	Technical	Support staff	Data management	Knowledge management and system oversight	Gestion des connaissances et surveillance du système	How well do you maintain and update PEV databases, assist in developing data management tools, and support knowledge-sharing efforts?	How well does your subordinate maintain and update PEV databases, assist in developing data management tools, and support knowledge-sharing efforts?	Dans quelle mesure maintenez-vous et mettez-vous à jour les bases de données PEV, aidez-vous au développement d’outils de gestion des données et soutenez-vous les efforts de partage des connaissances ?	Dans quelle mesure votre subordonné maintient-il et met-il à jour les bases de données PEV, aide-t-il au développement d’outils de gestion des données et soutient-il les efforts de partage des connaissances ?
TECH-109	Technical	Support staff	Data management	Data Utilization for Decision-Making	Utilisation des données pour la prise de décision	How effectively do you analyze collected and validated data to identify trends and gaps, preparing summaries that aid in operational improvements and decision-making?	How effectively does your subordinate analyze collected and validated data to identify trends and gaps, preparing summaries that aid in operational improvements and decision-making?	Dans quelle mesure analysez-vous efficacement les données collectées et validées pour identifier les tendances et les lacunes, en préparant des résumés qui aident aux améliorations opérationnelles et à la prise de décision ?	Dans quelle mesure votre subordonné analyse-t-il efficacement les données collectées et validées pour identifier les tendances et les lacunes, en préparant des résumés qui aident aux améliorations opérationnelles et à la prise de décision ?
TECH-110	Technical	Support staff	Communication	Integrated Communication and Digital Marketing Planning	Planification intégrée de la communication et du marketing numérique	How well do you assist in developing and disseminating vaccination social marketing plans, operational communication guides, and digital strategies, ensuring consistent messaging across platforms?	How well does your subordinate assist in developing and disseminating vaccination social marketing plans, operational communication guides, and digital strategies, ensuring consistent messaging across platforms?	Dans quelle mesure contribuez-vous à la création et à la diffusion de supports de communication sur la vaccination, en assurant une messagerie cohérente sur toutes les plateformes ?	Dans quelle mesure votre subordonné contribue-t-il à l’élaboration et à la diffusion de plans de marketing social de vaccination, de guides de communication opérationnelle et de stratégies numériques, garantissant ainsi la cohérence des messages sur toutes les plateformes ?
TECH-111	Technical	Support staff	Communication	Community Engagement and Mobilization	Engagement et mobilisation communautaires	How well do you support the organization of promotional activities and facilitates the involvement of community actors, such as leaders, NGOs, and CSOs, to promote vaccination campaigns?	How well does your subordinate support the organization of promotional activities and facilitates the involvement of community actors, such as leaders, NGOs, and CSOs, to promote vaccination campaigns?	Dans quelle mesure soutenez-vous l’organisation d’activités promotionnelles et facilitez-vous l’implication des acteurs communautaires, tels que les dirigeants, les ONG et les OSC, pour promouvoir les campagnes de vaccination ?	Dans quelle mesure votre subordonné soutient-il l’organisation d’activités promotionnelles et facilite-t-il l’implication des acteurs communautaires, tels que les dirigeants, les ONG et les OSC, pour promouvoir les campagnes de vaccination ?
TECH-112	Technical	Support staff	Communication	Monitoring and Reporting	Suivi et rapports	How well do you track the effectiveness of communication activities and ensure timely updates on performance metrics?	How well does your subordinate track the effectiveness of communication activities and ensure timely updates on performance metrics?	Dans quelle mesure suivez-vous l’efficacité des activités de communication et assurez-vous des mises à jour opportunes sur les indicateurs de performance ?	Dans quelle mesure votre subordonné suit-il l’efficacité des activités de communication et garantit-il des mises à jour opportunes sur les indicateurs de performance ?
TECH-113	Technical	Support staff	Communication	Policy Advocacy and Strategic Planning	Plaidoyer politique et planification stratégique	How effectively do you assist in developing and implementing advocacy activities to prioritize vaccination on key institutional agendas?	How effectively does your subordinate assist in developing and implementing advocacy activities to prioritize vaccination on key institutional agendas?	Dans quelle mesure contribuez-vous efficacement à l’élaboration et à la mise en œuvre d’activités de plaidoyer visant à donner la priorité à la vaccination dans les principaux programmes institutionnels ?	Dans quelle mesure votre subordonné contribue-t-il efficacement à l’élaboration et à la mise en œuvre d’activités de plaidoyer visant à donner la priorité à la vaccination dans les principaux programmes institutionnels ?
TECH-114	Technical	Support staff	Communication	Partnership Development and Resource Mobilization	Développement de partenariats et mobilisation des ressources	How well do you support the identification and engagement of stakeholders, including CSOs, donors, and local authorities, to foster partnerships that strengthen vaccination funding and outreach?	How well does your subordinate support the identification and engagement of stakeholders, including CSOs, donors, and local authorities, to foster partnerships that strengthen vaccination funding and outreach?	Dans quelle mesure soutenez-vous l’identification et l’engagement des parties prenantes, notamment les OSC, les donateurs et les autorités locales, pour favoriser des partenariats qui renforcent le financement et la sensibilisation à la vaccination ?	Dans quelle mesure votre subordonné soutient-il l’identification et l’engagement des parties prenantes, notamment les OSC, les donateurs et les autorités locales, pour favoriser des partenariats qui renforcent le financement et la sensibilisation à la vaccination ?
TECH-115	Technical	Support staff	Communication	Monitoring, Capacity Building, and Reporting	Suivi, renforcement des capacités et rapports	How effectively do you assist in capacity-building initiatives for local partnerships, supports CSOs, and contributes to quarterly and annual reports?	How effectively does your subordinate assist in capacity-building initiatives for local partnerships, supports CSOs, and contributes to quarterly and annual reports?	Dans quelle mesure contribuez-vous efficacement aux initiatives de renforcement des capacités des partenariats locaux, soutenez-vous les OSC et contribuez-vous aux rapports trimestriels et annuels ?	Dans quelle mesure votre subordonné contribue-t-il efficacement aux initiatives de renforcement des capacités des partenariats locaux, soutient-il les OSC et contribue-t-il aux rapports trimestriels et annuels ?
TECH-116	Technical	Support staff	Finance	Timely Report Submission	Transmission ponctuelle des rapports	Monthly report submitted no later than the 5th of the following month.	Monthly report submitted no later than the 5th of the following month.	Rapport mensuel transmis au plus tard le 5 du mois suivant.	Rapport mensuel remis au plus tard le 5 du mois suivant.
TECH-117	Technical	Support staff	Finance	Reconciliation of General Balance	Présence de la balance générale	General balance analyzed with reconciliation of cash balances and bank statements.	General balance analyzed with reconciliation of cash balances and bank statements.	Analyse de la balance générale avec rapprochement des soldes de caisse et de banque.	Bilan général analysé avec rapprochement des soldes de trésorerie et des relevés bancaires.
TECH-118	Technical	Support staff	Finance	Bank Statement Production	Production des relevés bancaires	Bank statements and reconciliation reports produced for all accounts.	Bank statements and reconciliation reports produced for all accounts.	Relevés bancaires et états de rapprochement produits pour chaque compte.	Relevés bancaires et rapports de rapprochement produits pour tous les comptes.
TECH-119	Technical	Support staff	Human resource	Personnel management	Gestion du personnel	How well do you maintain accurate and up-to-date personnel records, ensuring timely updates in the HR Dashboard while adhering to HR policies and organizational standards. Regularly verifies records to ensure completeness and accuracy?	How well does your subordinate maintain accurate and up-to-date personnel records, ensuring timely updates in the HR Dashboard while adhering to HR policies and organizational standards. Regularly verifies records to ensure completeness and accuracy?	Dans quelle mesure maintenez-vous des dossiers du personnel à jour et conformes aux politiques RH et aux normes organisationnelles, y compris la mise à jour régulière du tableau de bord RH ?	Dans quelle mesure votre subordonné tient-il des dossiers du personnel précis et à jour, en assurant des mises à jour régulières dans le tableau de bord RH, tout en respectant les politiques RH et les normes organisationnelles ? Vérifie-t-il régulièrement les dossiers pour en garantir l'exhaustivité et l'exactitude ?
TECH-120	Technical	Support staff	Human resource	Employee Performance Monitoring	Suivi des performances des employés	How well do you track and report on employee attendance, punctuality, and adherence to workplace policies, compiling monthly report for review by superiors?	How well does your subordinate track and report on employee attendance, punctuality, and adherence to workplace policies, compiling monthly report for review by superiors?	Dans quelle mesure suivez-vous et signalez-vous efficacement la présence des employés, leur ponctualité et leur respect des politiques du lieu de travail, en compilant un rapport mensuel à soumettre à l'examen des supérieurs ?	Dans quelle mesure votre subordonné suit-il et rend-il compte de la présence des employés, de leur ponctualité et de leur respect des politiques du lieu de travail, en compilant un rapport mensuel à soumettre à l'examen des supérieurs ?
TECH-121	Technical	Support staff	Human resource	Capacity-Building and Development	Renforcement des capacités et développement	How well do you monitor and report on capacity-building activities, including e-learning initiatives, ensuring that dashboards and training logs are updated regularly	How well does your subordinate monitor and report on capacity-building activities, including e-learning initiatives, ensuring that dashboards and training logs are updated regularly	Dans quelle mesure surveillez-vous les activités de renforcement des capacités, y compris les initiatives d’apprentissage en ligne ?	Dans quelle mesure votre subordonné surveille-t-il et rend-il compte des activités de renforcement des capacités, y compris des initiatives d'apprentissage en ligne, en veillant à ce que les tableaux de bord et les journaux de formation soient mis à jour régulièrement ?
TECH-122	Technical	Support staff	Human resource	Resource and Allowance Management	Gestion des ressources et des allocations	How well do you process allowances for PEV staff and maintain detailed records of operational resources?	How well does your subordinate process allowances for PEV staff and maintain detailed records of operational resources?	Dans quelle mesure traitez-vous les indemnités du personnel du PEV et conservez-vous des registres détaillés des ressources opérationnelles ?	Dans quelle mesure votre subordonné traite-t-il les indemnités du personnel PEV et conserve-t-il des registres détaillés des ressources opérationnelles ?
TECH-123	Technical	Support staff	Human resource	Policy Compliance and Implementation	Conformité et mise en œuvre des politiques	How effectively do you adhere to HR policies and procedures, reporting violations or challenges promptly?	How effectively does your subordinate adhere to HR policies and procedures, reporting violations or challenges promptly?	Dans quelle mesure respectez-vous efficacement les politiques et procédures RH, en signalant rapidement les violations ou les défis ?	Dans quelle mesure votre subordonné adhère-t-il efficacement aux politiques et procédures RH, en signalant rapidement les violations ou les défis ?
TECH-124	Technical	Support staff	Finance	Platform Reconciliation	Rapprochement des plateformes	Reconciliation statements from WHO, UNICEF, GAVI, CDS, FPP, etc. are produced and consistent.	Reconciliation statements from WHO, UNICEF, GAVI, CDS, FPP, etc. are produced and consistent.	États de rapprochement produits et cohérents entre les plateformes (OMS, UNICEF, GAVI, etc.).	Les états de rapprochement de l’OMS, de l’UNICEF, de GAVI, du CDS, du FPP, etc. sont produits et cohérents.
TECH-125	Technical	Support staff	Finance	Debtor/Creditor List Accuracy	Justification des soldes clients/fournisseurs	Updated list with clear justification for each balance.	Updated list with clear justification for each balance.	Liste mise à jour avec justification claire de chaque solde.	Liste mise à jour avec justification claire pour chaque solde.
TECH-126	Technical	Support staff	Finance	Account Anomaly Absence	Absence d’anomalies comptables	No accounting inconsistencies (e.g., no debit balances in supplier accounts).	No accounting inconsistencies (e.g., no debit balances in supplier accounts).	Aucune anomalie comptable (ex : pas de solde débiteur dans un compte fournisseur).	Aucune incohérence comptable (par exemple, aucun solde débiteur dans les comptes fournisseurs).
TECH-127	Technical	Support staff	Prestation des Services de Vaccination	Planning and Coordination	Planification et coordination	How well do you support the preparation and follow-up of work plans and reports to align with the PEV goals?	How well does your subordinate support the preparation and follow-up of work plans and reports to align with the PEV goals?	Dans quelle mesure soutenez-vous la préparation et le suivi des plans de travail et des rapports pour les aligner sur les objectifs du PEV ?	Dans quelle mesure votre subordonné soutient-il la préparation et le suivi des plans de travail et des rapports pour les aligner sur les objectifs du PEV ?
TECH-128	Technical	Support staff	Prestation des Services de Vaccination	Monitoring, Evaluation, and Reporting	Suivi, évaluation et rapports	How well do you participate in collecting, compiling, and updating data for monitoring and reporting on PEV activities?	How well does your subordinate participate in collecting, compiling, and updating data for monitoring and reporting on PEV activities?	Dans quelle mesure participez-vous à la collecte, à la compilation et à la mise à jour des données pour le suivi et le reporting des activités PEV ?	Dans quelle mesure votre subordonné participe-t-il à la collecte, à la compilation et à la mise à jour des données pour le suivi et le reporting des activités PEV ?
TECH-129	Technical	Support staff	Prestation des Services de Vaccination	Data Management and Use	Gestion et utilisation des données	How well do you contribute to ensuring data quality and sharing relevant information with your team?	How well does your subordinate contribute to ensuring data quality and sharing relevant information with your team?	Dans quelle mesure contribuez-vous à garantir la qualité des données et à partager des informations pertinentes avec votre équipe ?	Dans quelle mesure votre subordonné contribue-t-il à garantir la qualité des données et à partager des informations pertinentes avec votre équipe ?
TECH-130	Technical	Support staff	Finance	Suspense Account Clearance	Traitement des comptes d’attente	All suspense account balances justified and cleared before monthly close.	All suspense account balances justified and cleared before monthly close.	Tous les soldes des comptes d’attente sont justifiés et apurés avant la clôture mensuelle.	Tous les soldes des comptes en suspens justifiés et apurés avant la clôture mensuelle.
TECH-131	Technical	Support staff	Finance	Budget Monitoring	Suivi budgétaire	Commitment vs. expenditure tracking table produced (if applicable).	Commitment vs. expenditure tracking table produced (if applicable).	Tableau de suivi des engagements vs dépenses produit (si applicable).	Tableau de suivi des engagements et des dépenses produit (le cas échéant).
TECH-132	Technical	Support staff	Finance	Document Quality	Qualité des pièces comptables	Digital documents are complete, readable, and well organized.	Digital documents are complete, readable, and well organized.	Les pièces comptables sont complètes, lisibles et bien classées.	Les documents numériques sont complets, lisibles et bien organisés.
TECH-133	Technical	Support staff	Finance	Staff Engagement	Participation et disponibilité	Active participation in meetings and timely response to central-level requests.	Active participation in meetings and timely response to central-level requests.	Participation active aux réunions et réactivité aux demandes du niveau central.	Participation active aux réunions et réponse rapide aux demandes du niveau central.
TECH-134	Technical	Middle management	Prestation des Services de Vaccination	Capacity Building and Training	Renforcement des capacités et formation	How effectively do you contribute to training and capacity building of staff involved in routine immunization?	How effectively does your subordinate contribute to training and capacity building of staff involved in routine immunization?	Dans quelle mesure participez-vous activement à la formation et au renforcement des capacités du personnel impliqué dans la vaccination de routine ?	Dans quelle mesure votre subordonné contribue-t-il efficacement à la formation et au renforcement des capacités du personnel impliqué dans la vaccination de routine ?
TECH-135	Technical	Middle management	Prestation des Services de Vaccination	Monitoring of Strategies and Data Quality	Suivi des approches et qualité des données	How effectively do you assess the implementation of ACD, ACE approaches and DQS activities to ensure data quality and program performance?	How effectively does your subordinate assess the implementation of ACD, ACE approaches and DQS activities?	Dans quelle mesure évaluez-vous la mise en œuvre des approches ACD, ACE et des activités de DQS pour garantir la qualité des données et des interventions ?	Dans quelle mesure votre subordonné évalue-t-il efficacement la mise en œuvre des approches ACD, ACE et des activités de DQS ?
TECH-136	Technical	Middle management	Prestation des Services de Vaccination	Strategy Development for Underperforming Districts	Développement de stratégies d’accélération	How effectively do you develop and monitor vaccination acceleration strategies for underperforming districts in collaboration with other sections?	How effectively does your subordinate develop and monitor vaccination acceleration strategies for underperforming districts?	Dans quelle mesure développez-vous et suivez-vous des stratégies d’accélération de la vaccination pour les districts sous-performants en collaboration avec les autres sections ?	Dans quelle mesure votre subordonné développe-t-il et suit-il efficacement des stratégies d’accélération de la vaccination pour les districts sous-performants ?
TECH-137	Technical	Middle management	Prestation des Services de Vaccination	Data Review and Use	Revue et utilisation des données	How effectively do you participate in monthly immunization data review meetings to inform decision-making?	How effectively does your subordinate participate in immunization data review meetings to inform decisions?	Dans quelle mesure participez-vous activement aux réunions mensuelles de revue des données de vaccination pour orienter la prise de décision ?	Dans quelle mesure votre subordonné participe-t-il efficacement aux réunions de revue des données pour orienter la prise de décision ?
TECH-138	Technical	Support staff	Prestation des Services de Vaccination	Community Engagement Support	Appui à la mobilisation communautaire	How effectively do you support community mobilization activities and relay key messages to caregivers during vaccination campaigns?	How effectively does your subordinate support community mobilization activities and relay key messages to caregivers during vaccination campaigns?	Dans quelle mesure soutenez-vous les activités de mobilisation communautaire et relayez-vous les messages clés aux parents lors des campagnes de vaccination ?	Dans quelle mesure votre subordonné soutient-il efficacement les activités de mobilisation communautaire et transmet-il des messages clés aux soignants lors des campagnes de vaccination ?
TECH-139	Technical	Support staff	Driver	Vehicle Operation and Safety	Fonctionnement et sécurité des véhicules	Do you transport staff and goods safely while following traffic and safety rules?	Does your subordinate transport staff and goods safely while following traffic and safety rules?	Transportez-vous le personnel et les marchandises en toute sécurité tout en respectant les règles de circulation et de sécurité ?	Votre subordonné transporte-t-il le personnel et les marchandises en toute sécurité tout en respectant les règles de circulation et de sécurité ?
TECH-140	Technical	Support staff	Driver	Vehicle Maintenance and Documentation	Entretien et documentation du véhicule	Do you maintain vehicle cleanliness and keep service records updated?	Does your subordinate maintain vehicle cleanliness and update service records?	Maintenez-vous la propreté du véhicule et tenez-vous à jour les dossiers d’entretien ?	Votre subordonné maintient-il la propreté du véhicule et met-il à jour les dossiers d’entretien ?
TECH-141	Technical	Support staff	Driver	Timeliness and Responsiveness	Ponctualité et réactivité	Are you punctual and available when assigned driving tasks?	Is your subordinate punctual and responsive when assigned driving tasks?	Êtes-vous ponctuel et disponible lorsque des tâches de conduite vous sont assignées ?	Votre subordonné est-il ponctuel et disponible lorsque des tâches de conduite lui sont assignées ?
TECH-142	Technical	Support staff	Driver	Communication and Conduct	Communication et comportement	Do you communicate clearly and conduct yourself professionally with passengers and staff?	Does your subordinate communicate clearly and behave professionally with passengers and staff?	Communiquez-vous clairement et vous comportez-vous de manière professionnelle avec les passagers et le personnel ?	Votre subordonné communique-t-il clairement et se comporte-t-il de manière professionnelle avec les passagers et le personnel ?
TECH-143	Technical	Senior leadership	Procurement	Strategic Procurement Planning	Planification stratégique des achats	Do you align procurement priorities with national and program goals?	Does your subordinate align procurement priorities with program objectives?	Alignez-vous les priorités d’achat avec les objectifs nationaux et du programme ?	Votre subordonné aligne-t-il les priorités d’achat avec les objectifs du programme ?
TECH-144	Technical	Middle management	Procurement	Strategic Procurement Planning	Planification stratégique des achats	Do you develop detailed procurement plans and track progress to guide implementation?	Does your subordinate develop and track implementation of procurement plans?	Développez-vous des plans d’achats détaillés et suivez-vous leur mise en œuvre ?	Votre subordonné développe-t-il et suit-il la mise en œuvre des plans d’achat ?
TECH-145	Technical	Support staff	Procurement	Strategic Procurement Planning	Planification stratégique des achats	Do you assist with scheduling and tracking of daily procurement tasks?	Does your subordinate support daily procurement tracking and updates?	Aidez-vous à planifier et suivre les tâches quotidiennes d’achat ?	Votre subordonné soutient-il le suivi et la mise à jour quotidienne des achats ?
TECH-146	Technical	Senior leadership	Procurement	Vendor & Stock Oversight	Supervision des fournisseurs et des stocks	Do you lead vendor management and ensure oversight of stock levels?	Does your subordinate oversee vendor management and ensure stock availability?	Dirigez-vous la gestion des fournisseurs et supervisez-vous les niveaux de stock ?	Votre subordonné supervise-t-il les fournisseurs et garantit-il la disponibilité des stocks ?
TECH-147	Technical	Middle management	Procurement	Vendor & Stock Oversight	Supervision des fournisseurs et des stocks	Do you evaluate supplier performance and manage stock reconciliation?	Does your subordinate evaluate suppliers and manage stock reconciliation?	Évaluez-vous la performance des fournisseurs et effectuez-vous la réconciliation des stocks ?	Votre subordonné évalue-t-il les fournisseurs et gère-t-il la réconciliation des stocks ?
TECH-148	Technical	Support staff	Procurement	Vendor & Stock Oversight	Supervision des fournisseurs et des stocks	Do you label, register, and verify received items in stock records?	Does your subordinate correctly register and tag items in inventory system?	Étiquetez-vous, enregistrez-vous et vérifiez-vous les articles reçus ?	Votre subordonné enregistre-t-il correctement les articles dans le système de stock ?
TECH-149	Technical	Senior leadership	Procurement	Policy & Compliance Assurance	Conformité aux politiques d’achat	Do you ensure procurement policies meet national and donor compliance standards?	Does your subordinate ensure compliance with procurement policies and audits?	Garantissez-vous la conformité des politiques d’achat aux normes nationales et des bailleurs ?	Votre subordonné garantit-il la conformité aux politiques d’achat et aux audits ?
TECH-150	Technical	Middle management	Procurement	Policy & Compliance Assurance	Conformité aux politiques d’achat	Do you monitor compliance with procurement SOPs and flag irregularities?	Does your subordinate track procurement compliance and escalate issues?	Surveillez-vous la conformité aux SOPs et signalez-vous les irrégularités ?	Votre subordonné suit-il la conformité et remonte-t-il les problèmes ?
TECH-151	Technical	Support staff	Procurement	Policy & Compliance Assurance	Conformité aux politiques d’achat	Do you complete and file procurement documents accurately and on time?	Does your subordinate submit and file procurement documentation properly?	Remplissez-vous et archivez-vous correctement les documents d’achat ?	Votre subordonné soumet-il et archive-t-il correctement les documents d’achat ?
TECH-152	Technical	Senior leadership	Procurement	Process Coordination & Documentation	Coordination et documentation des achats	Do you coordinate procurement workflows across units and funding sources?	Does your subordinate coordinate cross-unit procurement activities?	Coordonnez-vous les flux d’achat entre les unités et les sources de financement ?	Votre subordonné coordonne-t-il les activités d’achat interunités ?
TECH-153	Technical	Middle management	Procurement	Process Coordination & Documentation	Coordination et documentation des achats	Do you coordinate timelines with logistics and validate procurement requests?	Does your subordinate coordinate procurement schedules with logistics team?	Coordonnez-vous les délais avec la logistique et validez-vous les demandes d’achat ?	Votre subordonné coordonne-t-il les achats avec l’équipe logistique ?
TECH-154	Technical	Support staff	Procurement	Process Coordination & Documentation	Coordination et documentation des achats	Do you assist in bid openings, vendor follow-up, and filing of records?	Does your subordinate support bid processing, follow-ups, and recordkeeping?	Aidez-vous à l’ouverture des offres, au suivi des fournisseurs et à l’archivage ?	Votre subordonné soutient-il les processus d’appel d’offres et l’archivage ?

## Sheet: Superior Metrics
Superior/supervisor metrics: 360-degree reviewer-source assessment items
Metric ID	Metric type	Competency domain/theme EN	Competency domain/theme FR	Metric item EN	Metric item FR
SUP-001	Superior/supervisor	Leadership and Direction	Leadership et direction	How effectively does your superior provide clear leadership and guidance, ensuring alignment with broader goals and the successful completion of tasks?	Dans quelle mesure votre supérieur fournit-il efficacement un leadership et des conseils clairs, garantissant l’alignement avec des objectifs plus larges et la réussite des tâches ?
SUP-002	Superior/supervisor	Problem Solving	Prise de décision et résolution de problèmes	How well does your superior make informed decisions that positively impact the team, balancing speed with quality, and resolving issues in a timely and effective manner?	Dans quelle mesure votre supérieur prend-il des décisions éclairées qui ont un impact positif sur l’équipe, en équilibrant rapidité et qualité et en résolvant les problèmes de manière rapide et efficace ?
SUP-003	Superior/supervisor	Conflict Management	Gestion des conflits	How effectively does your superior manage conflicts within the team, ensuring that disagreements are resolved constructively and fostering a positive and productive work environment?	Dans quelle mesure votre supérieur gère-t-il efficacement les conflits au sein de l’équipe, en veillant à ce que les désaccords soient résolus de manière constructive et en favorisant un environnement de travail positif et productif ?
SUP-004	Superior/supervisor	Team Development	Soutien au développement de l'équipe	How well does your superior support the professional growth of team members, offering feedback, mentorship, and opportunities for learning and skill-building?	Dans quelle mesure votre supérieur soutient-il la croissance professionnelle des membres de l’équipe, en leur offrant des commentaires, du mentorat et des opportunités d’apprentissage et de développement des compétences ?
SUP-005	Superior/supervisor	Communication and Transparency	Communication et transparence	How transparent and effective is your superior in communicating important decisions, goals, changes, and expectations to the team?	Dans quelle mesure votre supérieur est-il transparent et efficace dans la communication des décisions, des objectifs, des changements et des attentes importants à l’équipe ?
SUP-006	Superior/supervisor	Integrity and Accountability	Intégrité et responsabilité	How well does your superior demonstrate integrity and accountability, taking responsibility for decisions and actions, and leading by example in managing team dynamics?	Dans quelle mesure votre supérieur fait-il preuve d’intégrité et de responsabilité, en assumant la responsabilité de ses décisions et de ses actions et en montrant l’exemple dans la gestion de la dynamique d’équipe ?
SUP-007	Superior/supervisor	Accountability & Ownership	Responsabilité et propriété	How well does your superior demonstrate accountability by completing tasks thoroughly and transparently, taking ownership of personal responsibilities and contributing to the collective reliability of the team	Dans quelle mesure votre supérieur fait-il preuve de responsabilité en accomplissant les tâches de manière approfondie et transparente, en assumant ses responsabilités personnelles et en contribuant à la fiabilité collective de l'équipe ?
SUP-008	Superior/supervisor	Performance Management	Leadership d'équipe et gestion de la performance	How effectively does your superior set clear goals for the team's work and foster collaboration to meet the team’s objectives?	Dans quelle mesure votre supérieur définit-il efficacement des objectifs clairs pour le travail de l’équipe et encourage-t-il la collaboration pour atteindre les objectifs de l’équipe ?

## Sheet: Peer Metrics
Peer metrics: 360-degree colleague assessment items
Metric ID	Metric type	Competency domain/theme EN	Competency domain/theme FR	Metric item EN	Metric item FR
PEER-001	Peer	Collaboration and Teamwork	Collaboration et travail d'équipe	How effectively does your colleague work with you and others across departments to support shared goals and team efforts?	Dans quelle mesure votre collègue travaille-t-il efficacement avec vous et d’autres personnes de tous les services pour soutenir les objectifs communs et les efforts de l’équipe ?
PEER-002	Peer	Communication Skills	Compétences en communication	How clearly and effectively does your colleague communicate, sharing information and updates relevant to the team’s success?	Dans quelle mesure votre collègue communique-t-il clairement et efficacement, partageant-il des informations et des mises à jour pertinentes pour le succès de l'équipe ?
PEER-003	Peer	Problem-Solving and Initiative	Résolution de problèmes et initiative	How proactive is your colleague in identifying challenges and proposing solutions within their role?	Dans quelle mesure votre collègue est-il proactif dans l’identification des défis et la proposition de solutions dans le cadre de son rôle ?
PEER-004	Peer	Adaptability and Flexibility	Adaptabilité et flexibilité	How well does your colleague adapt to changing circumstances, such as shifting team priorities, project demands, or external factors?	Dans quelle mesure votre collègue s’adapte-t-il aux circonstances changeantes, telles que les changements de priorités de l’équipe, les exigences du projet ou les facteurs externes ?
PEER-005	Peer	Accountability and Dependability	Responsabilité et fiabilité	How consistently does your colleague meet deadlines and deliver quality work that aligns with team expectations?	Dans quelle mesure votre collègue respecte-t-il systématiquement les délais et fournit-il un travail de qualité conforme aux attentes de l’équipe ?
PEER-006	Peer	Interpersonal Relationships	Relations interpersonnelles	How well does your colleague maintain positive relationships with team members and contribute to a healthy work environment, including resolving conflicts when necessary?	Dans quelle mesure votre collègue entretient-il des relations positives avec les membres de l’équipe et contribue-t-il à un environnement de travail sain, notamment en résolvant les conflits lorsque cela est nécessaire ?
PEER-007	Peer	Accountability & Ownership	Responsabilité et propriété	How well does your colleague demonstrate accountability by completing tasks thoroughly and transparently, taking ownership of personal responsibilities and contributing to the collective reliability of the team	Dans quelle mesure votre collègue fait-il preuve de responsabilité en accomplissant les tâches de manière approfondie et transparente, en assumant ses responsabilités personnelles et en contribuant à la fiabilité collective de l'équipe ?
PEER-008	Peer	Team Leadership	Leadership d'équipe et gestion de la performance	How effectively does your colleague set clear goals for their work and foster collaboration to meet the team’s objectives?	Dans quelle mesure votre collègue définit-il efficacement des objectifs clairs pour son travail et favorise-t-il la collaboration pour atteindre les objectifs de l'équipe ?
