# Supplementary material
Source: Research Square preprint supplement (doi:10.21203/rs.3.rs-10208576/v1)
Supplement: Supplementary file 2 [file c9027055d454547242f1779a.xlsx]

## Sheet: README
Supplementary File 2. Aggregated PMS appraisal dataset and data dictionary
Field	Description
Manuscript	Design, rollout and early institutionalisation of a digital 360-degree performance management system in Cameroon’s Expanded Programme on Immunization: an implementation study
Purpose	Provides de-identified aggregate data and data dictionary supporting the manuscript’s first-cycle PMS performance outputs and calibration signals.
Data source	Routine PMS appraisal exports from self, supervisor/superior, peer and subordinate review modules; dashboard-reported manuscript summary values are also included.
Privacy note	This workbook does not include individual-level appraisal rows, names, emails, comments, review IDs or timestamps.
Rating scale	1.0–1.9 = unsatisfactory; 2.0–2.9 = needs improvement; 3.0–3.9 = meets expectations; 4.0–5.0 = exceeds expectations.
Treatment of 0 ratings	0 was treated as not applicable and excluded from rating means.
Important denominator note	The raw rollout dashboard captured 181 appraised staff after excluding drivers. Some dashboard cards used staff-level aggregation while raw extracts are metric-row-level exports.
Use limitation	These aggregate data are intended for manuscript transparency and reproducibility of descriptive findings; they should not be used to identify or rank individual staff.
Prepared on	2026-06-30

## Sheet: Data Dictionary
Data dictionary
Definitions of fields used in the aggregate sheets.
Field	Definition
Analysis stratum	Broad grouping used in manuscript tables, such as overall, gender, cadre, region or reviewer source.
Staff group	Aggregate staff group, such as male staff, female staff, executive leadership, senior leadership, middle management or support staff.
Staff appraised, n	Number of staff in the aggregate group where available from dashboard or manuscript analysis. Not derived from row-level data when identifiers are removed.
Average 360-degree score	Final composite 360-degree rating reported from the dashboard/manuscript table.
Reviewer source	360-degree review component: self, supervisor/superior, peer or subordinate.
Self rating	Average rating from staff self-assessment.
Supervisor rating	Average rating from superior/supervisor assessment.
Peer rating	Average rating from peer assessment.
Subordinate rating	Average rating from subordinate assessment, where applicable.
General competence	Behavioural and leadership-related PMS metrics.
Technical competence	Role-specific PMS metrics mapped to job functions/departments.
Records, n	Number of aggregated metric-level records in the source extract for that group.
Valid ratings, n	Number of records with a valid PMS rating from 1 to 5.
Zero/invalid ratings, n	Number of records coded 0 in the source extract; treated as not applicable.
Mean rating	Arithmetic mean of valid ratings only.
SD	Standard deviation of valid ratings where n > 1.
Performance category	Interpretation category based on score range: unsatisfactory, needs improvement, meets expectations, exceeds expectations.

## Sheet: Table 5 360 Profile
Table 5. 360-degree performance profile
Manuscript-ready aggregate dashboard values for the 360-degree appraisal profile.
Analysis stratum	Staff group	Staff appraised, n	Average 360-degree score	Self rating	Supervisor rating	Peer rating	Subordinate rating
Overall	All appraised staff	181	4.2	4.3	4.1	4.08	4.37
Gender	Male staff	102	4.2	4.3	4.1	4.1	4.4
Gender	Female staff	79	4.2	4.3	4	4	4.3
Cadre	Executive leadership	3	4.3	4.3	4.1	4.4	4.3
Cadre	Senior leadership	18	4.3	4.3	4.1	4.4	4.3
Cadre	Middle management	72	4.3	4.3	4.1	4.2	4.4
Cadre	Support staff	88	3.9	4.3	4.1	3.9	4.4

## Sheet: Table 6 Calibration
Table 6. Performance-domain variation and calibration signals
Manuscript-ready aggregate values used to interpret the first PMS review cycle.
Analysis domain	Indicator	Mean score / value	Comparator	Difference / range
Overall competence domains	Average general competence rating	4.22	Average technical competence rating, 4.10	+0.12
Overall competence domains	Average technical competence rating	4.1	Average general competence rating, 4.22	−0.12
General competence by cadre	Executive leadership	4	Senior/middle management	−0.3
General competence by cadre	Senior leadership	4.3	Support staff	+0.2
General competence by cadre	Middle management	4.3	Support staff	+0.2
General competence by cadre	Support staff	4.1	Senior/middle management	−0.2
Technical competence by cadre	Executive leadership	4.2	Support staff	+0.3
Technical competence by cadre	Senior leadership	4.3	Support staff	+0.4
Technical competence by cadre	Middle management	4.3	Support staff	+0.4
Technical competence by cadre	Support staff	3.9	Senior/middle management	−0.4
Performance category by cadre	Exceeded expectations: executive leadership	100.00%	Support staff, 58.82%	+41.18 percentage points
Performance category by cadre	Exceeded expectations: senior leadership	93.75%	Support staff, 58.82%	+34.93 percentage points
Performance category by cadre	Exceeded expectations: middle management	83.33%	Support staff, 58.82%	+24.51 percentage points
Performance category by cadre	Exceeded expectations: support staff	58.82%	Executive leadership, 100.00%	−41.18 percentage points
Self–supervisor calibration	Self general rating	4.34	Supervisor general rating, 4.12	+0.22
Self–supervisor calibration	Self technical rating	4.18	Supervisor technical rating, 4.03	+0.15
Regional variation	Highest average 360-degree regional score	4.4, North and South-West	Lowest regional score, West	+0.7
Regional variation	Lowest average 360-degree regional score	3.7, West	Highest regional score, North and South-West	−0.7
Regional variation	Highest average technical score	4.55, South-West	Lowest technical score, Littoral	+1.19
Regional variation	Lowest average technical score	3.36, Littoral	Highest technical score, South-West	−1.19
Note	Reviewer-source differences are calculated as self-rating minus supervisor rating. Values are descriptive first-cycle PMS outputs and should be interpreted as baseline performance and calibration signals, not causal evidence of workforce improvement.

## Sheet: Source Overview
Source overview
Aggregate overview of original PMS export sheets. Identifiers and comments are not reproduced.
Original sheet	Metric-level records, n	Original columns, n	Original fields present
Self appraisal	7332	13	Reviewer_Email, Reviewee_Name, Location, Department, Cadre, Appraisal, Metric_theme, Rating, Comment, DateSubmitted, Year, Review_Cycle, Review_ID
Superior appraisal	4494	13	Reviewer_Email, Reviewee_Email, Reviewee_Name, Location, Department, Cadre, Metric theme, Rating, Comment, DateSubmitted, Year, Review_Cycle, Review_ID
Subordinate appraisal	4617	14	Reviewer_Email, Reviewee_Email, Reviewee_Name, Location, Department, Cadre, Appraisal, Metric theme, Rating, Comment, DateSubmitted, Year, Review_Cycle, Review_ID
Peer appraisal	3827	13	Reviewer_Email, Reviewee_Email, Reviewee_Name, Location, Department, Cadre, Metric theme, Rating, Comment, DateSubmitted, Year, Review_Cycle, Review_ID

## Sheet: Data Quality
Data quality checks
Checks applied before creating aggregate tables from the de-identified appraisal export.
Check	Result	Interpretation / action
Total metric-level records in uploaded extract	20270	All rows across self, supervisor/superior, peer and subordinate sheets excluding headers.
Valid ratings included in means	20106	Ratings from 1 to 5.
Records coded 0	164	Excluded from means; interpreted as not applicable.
Missing ratings	0	No missing rating cells detected in parsed source data.
Other invalid non-zero ratings	0	No out-of-range non-zero values detected.
Identifier fields removed	Yes	Emails, names, review IDs, comments and timestamps are not included in this aggregate workbook.
Aggregation threshold	Aggregate groups only	No individual-level rows are included. Metric theme summary excludes very small valid counts (<5).

## Sheet: Rating Distribution
Rating distribution by reviewer source
Distribution includes valid ratings and records coded 0 for data-quality transparency.
Reviewer source	Rating value	Records, n	Percent of source records
Overall	0	164	0.00809077
Overall	1	85	0.00419339
Overall	2	358	0.0176616
Overall	3	2595	0.128022
Overall	4	8713	0.429847
Overall	5	8355	0.412185
Peer	0	26	0.00679383
Peer	1	12	0.00313562
Peer	2	90	0.0235171
Peer	3	593	0.154952
Peer	4	1892	0.494382
Peer	5	1214	0.31722
Self	0	87	0.0118658
Self	1	33	0.00450082
Self	2	99	0.0135025
Self	3	787	0.107338
Self	4	2944	0.401528
Self	5	3382	0.461266
Subordinate	0	50	0.0108295
Subordinate	1	30	0.00649773
Subordinate	2	124	0.0268573
Subordinate	3	804	0.174139
Subordinate	4	2042	0.442279
Subordinate	5	1567	0.339398
Supervisor/Superior	0	1	0.000222519
Supervisor/Superior	1	10	0.00222519
Supervisor/Superior	2	45	0.0100134
Supervisor/Superior	3	411	0.0914553
Supervisor/Superior	4	1835	0.408322
Supervisor/Superior	5	2192	0.487761

## Sheet: Reviewer Summary
Aggregate ratings by 360-degree reviewer source
Metric-row-level aggregate means from the de-identified PMS export. Ratings coded 0 were excluded from means.
Reviewer source	Records, n	Valid ratings, n	Zero/Non applicable ratings, n	Other invalid, n	Missing ratings, n	Mean rating	SD	Median	Minimum	Maximum
Peer	3827	3801	26	0	0	4.107	0.766	4	1	5
Self	7332	7245	87	0	0	4.317	0.755	4	1	5
Subordinate	4617	4567	50	0	0	4.093	0.824	4	1	5
Supervisor/Superior	4494	4493	1	0	0	4.37	0.709	4	1	5

## Sheet: Reviewer x Cadre
Aggregate ratings by reviewer source and cadre
Metric-row-level aggregate means after standardising cadre labels. Ratings coded 0 were excluded from means.
Reviewer source	Cadre	Records, n	Valid ratings, n	Zero/Non applicable ratings, n	Other invalid, n	Missing ratings, n	Mean rating	SD	Median	Minimum	Maximum
Peer	Executive Leadership	16	16	0	0	0	4.438	0.512	4	4	5
Peer	Middle Management	2488	2464	24	0	0	4.186	0.732	4	1	5
Peer	Senior Leadership	92	92	0	0	0	4.424	0.559	4	3	5
Peer	Support Staff	1231	1229	2	0	0	3.919	0.812	4	1	5
Self	Executive Leadership	76	76	0	0	0	4.25	0.656	4	3	5
Self	Middle Management	3335	3269	66	0	0	4.287	0.768	4	1	5
Self	Senior Leadership	596	596	0	0	0	4.54	0.547	5	3	5
Self	Support Staff	3325	3304	21	0	0	4.308	0.771	4	1	5
Subordinate	Executive Leadership	50	50	0	0	0	4.02	0.428	4	3	5
Subordinate	Middle Management	1863	1863	0	0	0	4.358	0.651	4	2	5
Subordinate	Senior Leadership	530	530	0	0	0	3.994	0.652	4	2	5
Subordinate	Support Staff	2174	2124	50	0	0	3.887	0.933	4	1	5
Supervisor/Superior	Executive Leadership	647	647	0	0	0	4.538	0.7	5	1	5
Supervisor/Superior	Middle Management	1522	1521	1	0	0	4.299	0.753	4	1	5
Supervisor/Superior	Senior Leadership	2309	2309	0	0	0	4.375	0.67	4	1	5
Supervisor/Superior	Support Staff	16	16	0	0	0	3.5	0.516	3.5	3	4

## Sheet: Competence x Cadre
Aggregate ratings by competence type and cadre
General and technical rows come from source sheets where the Appraisal field was present. Not classified rows are reviewer-source metric sheets without an Appraisal field.
Competence type	Cadre	Records, n	Valid ratings, n	Zero/Non applicable ratings, n	Other invalid, n	Missing ratings, n	Mean rating	SD	Median	Minimum	Maximum
General	Executive Leadership	42	42	0	0	0	4.071	0.64	4	3	5
General	Middle Management	2650	2636	14	0	0	4.308	0.709	4	2	5
General	Senior Leadership	616	616	0	0	0	4.343	0.613	4	3	5
General	Support Staff	2837	2837	0	0	0	4.207	0.771	4	1	5
Not classified	Executive Leadership	663	663	0	0	0	4.535	0.696	5	1	5
Not classified	Middle Management	4010	3985	25	0	0	4.229	0.742	4	1	5
Not classified	Senior Leadership	2401	2401	0	0	0	4.377	0.666	4	1	5
Not classified	Support Staff	1247	1245	2	0	0	3.913	0.81	4	1	5
Technical	Executive Leadership	84	84	0	0	0	4.202	0.555	4	3	5
Technical	Middle Management	2548	2496	52	0	0	4.318	0.749	4	1	5
Technical	Senior Leadership	510	510	0	0	0	4.212	0.702	4	2	5
Technical	Support Staff	2662	2591	71	0	0	4.074	0.948	4	1	5

[truncated: 3 more sheets: Regional Summary, Department Summary, Metric Theme Summary]
